# **Whole-genome sequence analysis unveils different origins of European and Asiatic mouflon and domestication-related genes in sheep**

Ze-Hui Chen<sup>1,2,16</sup>, Ya-Xi Xu<sup>3,16</sup>, Xing-Long Xie<sup>1,2</sup>, Dong-Feng Wang<sup>1,2</sup>, Diana Aguilar-Gómez<sup>4</sup>, Guang-Jian Liu<sup>5</sup>, Xin Li<sup>1,2</sup>, Ali Esmailizadeh<sup>6</sup>, Vahideh Rezaei<sup>6</sup>, Juha Kantanen<sup>7</sup>, Innokentyi Ammosov<sup>8</sup>, Maryam Nosrati<sup>9</sup>, Kathiravan Periasamy<sup>10</sup>, David W. Coltman<sup>11</sup>, Johannes A. Lenstra<sup>12</sup>, Rasmus Nielsen<sup>13,14,15\*</sup>, Meng-Hua Li<sup>1,3\*</sup>

<sup>1</sup>CAS Key Laboratory of Animal Ecology and Conservation Biology, Institution of Zoology, Chinese Academy of Sciences (CAS), Beijing, China

<sup>2</sup>University of Chinese Academy of Sciences (UCAS), Beijing, China

<sup>3</sup>College of Animal Science and Technology, China Agricultural University, Beijing, China

<sup>4</sup>Center for Computational Biology, University of California at Berkeley, Berkeley, CA 94720, USA

<sup>5</sup>Novogene Co., Ltd, Tianjin, China

<sup>6</sup>Department of Animal Science, Faculty of Agriculture, Shahid Bahonar University of Kerman, Kerman, Iran

<sup>7</sup>Natural Resources, Natural Resources Institute Finland (Luke), Jokioinen, Finland

<sup>8</sup>Board of Agricultural Office of Eveno-Bytantaj Region, Batagay-Alyta, Russia

<sup>9</sup>Department of Agriculture, Payame Noor University, Tehran, Iran

<sup>10</sup>Animal Production and Health Laboratory, Joint FAO/IAEA Division of Nuclear Techniques in Food and Agriculture, International Atomic Energy Agency, Vienna, Austria

<sup>11</sup>Department of Biological Sciences, University of Alberta, Edmonton, AB T6G2E9, Canada

<sup>12</sup>Faculty of Veterinary Medicine, Utrecht University, Utrecht, the Netherlands

<sup>13</sup>Department of Integrative Biology, University of California at Berkeley, Berkeley, CA 94720, USA

<sup>14</sup>Department of Statistics, UC Berkeley, Berkeley, CA 94707, USA.

<sup>15</sup>Globe Institute, University of Copenhagen, 1350 København K, Denmark.

<sup>16</sup>These authors contributed equally to this work.

\* e-mail: [menghua.li@cau.edu.cn](mailto:menghua.li@cau.edu.cn), [rasmus\\_nielsen@berkeley.edu](mailto:rasmus_nielsen@berkeley.edu)

## **Abstract**

The domestication and subsequent development of sheep are crucial events in the history of human civilization and the agricultural revolution. However, the impact of interspecific introgression on the genomic regions under domestication and subsequent selection remains unclear. Here, we analyze the whole genomes of domestic sheep and all their wild relative species. We found introgression from wild sheep such as the snow sheep and its American relatives (bighorn and thinhorn sheep) into urial, Asiatic and European mouflons. We observed independent events of adaptive introgression from wild sheep into the Asiatic and European mouflons, as well as shared introgressed regions from both snow sheep and argali into Asiatic mouflon before or during the domestication process. We revealed European mouflons arose through hybridization events between a now extinct sheep in Europe and feral domesticated sheep around 6,000 – 5,000 years BP. We also unveiled later introgressions from wild sheep to their sympatric domestic sheep after domestication. Several of the introgression events contain loci with candidate domestication genes (e.g., *PAPPA2*, *NR6A1*, *SH3GL3*, *RFX3* and *CAMK4*), associated with morphological, immune, reproduction or production traits (wool/meat/milk). We also detected introgression events that introduced genes related to nervous response (*NEURL1*), neurogenesis (*PRUNE2*), hearing ability (*USH2A*) and placental viability (*PAG11* and *PAG3*) to domestic sheep and their ancestral wild species from other wild species.

**Key words:** *Ovis* genus, introgression, domestication, adaptation

***Running title:*** The origins of domestication-related genes in sheep

## 1 **Introduction**

2 The genus *Ovis* spans ~8.31 million years of evolution and comprises eight extant  
3 species: domestic sheep *O. aries*, argali *O. ammon*, Asiatic mouflon *O. orientalis*,  
4 European mouflon *O. musimon*, urial *O. vignei*, bighorn sheep *O. canadensis*,  
5 thinhorn sheep *O. dalli* and snow sheep *O. nivicola*<sup>1</sup>. Earlier archeological and genetic  
6 studies have provided strong evidence for that sheep have been domesticated from  
7 their wild ancestor Asiatic mouflon (*O. orientalis*) in the Fertile Crescent ~12,000 –  
8 10,000 years BP<sup>2-4</sup>. The domestication during the Neolithic agricultural revolution  
9 had contributed significantly to human civilization by providing a stable source of  
10 meat, wool, leather and dairy.

11

12 In spite of varying diploid number of chromosomes ( $2n = 52 - 58$ )<sup>1</sup>, hybridization  
13 between wild and domestic sheep, as well as between wild sheep species, has been  
14 documented to produce viable and fertile interspecific hybrids<sup>5-9</sup>. Previous studies  
15 have shown genetic evidence for introgression<sup>10-14</sup>, including adaptive introgression  
16 from wild relatives to domestic sheep<sup>15,16</sup>. However, the importance of introgression  
17 in the entire *Ovis* genus and its contribution to the sheep domestication process  
18 remains largely unexplored.

19

20 Because wild sheep have adapted to different biogeographic ranges resulting in them  
21 being resilient to many biotic and abiotic stresses, the existing genetic variation of

22 wild sheep provide an important genetic resource for improving domestic sheep in  
23 response to increased food production demands, animal disease occurrence and rapid  
24 global climate change. Elucidating the evolutionary and genetic connection between  
25 wild and domesticated sheep is therefore important for understanding the potential for  
26 using wild sheep genetic material for improvement of domesticated sheep.

27

28 In this study, we use high-depth whole genome sequences (average coverage =  $\sim 21\times$ )  
29 of 72 individuals from the eight *Ovis* species, most of which were understudied in  
30 previous genomic studies<sup>7,17-19</sup>. We reconstructed the phylogeny and evolutionary  
31 history of these species. In addition, we explored gene flow between species and  
32 selection signatures of domestication. These findings add to our understanding of the  
33 origins of the Asian and European mouflons and the emergence of domestic sheep.

34

## 35 **Results**

### 36 **Sequencing and variant calling**

37 High-depth resequencing of 72 individuals from eight *Ovis* species (Fig.1a and  
38 Supplementary Table 1) generated a total of 35.91 billion 150-bp paired-end reads  
39 (5.39 Tb), and 35.84 billion clean reads (5.28 Tb) with an average depth of  $20.7\times$   
40 ( $12.2 - 36.9\times$ ) per individual and average genome coverage of 97.2% (96.5% – 98.3%)  
41 after filtering. The average sequence coverage was  $19.3\times$  for *O. aries*,  $17.8\times$  for *O.*  
42 *ammon*,  $18.9\times$  for *O. canadensis*,  $19.8\times$  for *O. vignei*,  $18.9\times$  for *O. musimon*,  $17.8\times$

43 for *O. nivicola*, 19.4× for *O. dalli*, and 27.1× for *O. orientalis*. On average, 95.83%  
44 individuals had  $\geq 4\times$  coverage, 90.11% had  $\geq 10\times$  coverage, and 46.68% had  $\geq 20\times$   
45 coverage. Of all the individual sequencing reads, 91.86% were mapped to the *O. aries*  
46 reference genome Oar\_v4.0 (Supplementary Table 2). Summed over all samples,  
47 125,982,209 SNPs, 13,043,920 INDELs (insertions and deletions  $\leq 50$ bp;  $\sim 0.89$   
48 million common indels shared by all sheep species and on average 2,605,718 per  
49 individual) (Table 1 and Supplementary Tables 2 – 6) and genome-wide structural  
50 variations (SVs, 51bp – 997.369 kb: inversions, insertions, deletions, duplications and  
51 translocations, on average 41,965 per individual), including copy number variations  
52 (CNVs, deletions and duplications of 51bp to 997.369 kb, on average 31,124 per  
53 individual) (Supplementary Table 7) were detected. The number of SVs shared by  
54 two species ranged from 29,884 to 91,186 (Supplementary Table 8 and  
55 Supplementary Fig. 1a). On average, 1.88% SVs were located in exonic regions, 65.2%  
56 SVs were located in intergenic regions, and 29.9% SVs were located in intronic  
57 regions, while 67.0%, 31.0% and 0.66% SNPs were in intergenic, intronic and exonic  
58 regions, respectively (Supplementary Tables 9 and 10).

59

60 The percentage of SNPs that was present in public databases [e.g., NCBI sheep  
61 dbSNP database v150 and European Variation Archive (EVA)] ranges from 78.1% in  
62 argali to 94.3% in domestic sheep (Supplementary Table 11). Our dataset added  
63 2,139,962 novel SNPs (an increase of 7.04%) to the NCBI and EVA database of

64 sheep genetic variants (Supplementary Table 6). Of the 176,403 common sites  
65 between detected SNPs and the Ovine BeadChip, an average of 288,638 genotypes  
66 observed here were validated by the Ovine Infinium HD SNP BeadChip data  
67 available for 14 individuals of the samples sequenced (97.1% validation rate, and  
68 297,115 common SNPs), and an average of 23,220 genotypes were validated by the  
69 Ovine SNP50K BeadChip data available for another 12 individuals of the samples  
70 (96.64% validation rate, and 22,583 common SNPs) (Supplementary Table 11).  
71  
72 Moreover, 74 randomly selected SNPs, which are from the NCBI sheep dbSNP  
73 database and the candidate genes identified below, were inspected in 4-12 individuals  
74 by Sanger sequencing and produced an overall validation rate of 95.5%  
75 (Supplementary Table 12). For PCR and qPCR validation of CNVs (deletions and  
76 duplications), 14 randomly selected CNVs with 85.4% concordant genotypes (38/42  
77 deletions and 32/40 duplications; Supplementary Table 13 and Supplementary Fig. 2)  
78 were successfully validated. The validation rates observed here are higher than those  
79 in previous studies<sup>17,20</sup>, which could be due to more efficient and precise CNV  
80 detection methods used here. The high validation rate indicated high reliability of the  
81 genetic variants created in this study.

82

83 **Patterns of variation**



84 The 126 million SNPs were detected across all eight species. The number of SNPs  
85 varied from 11.3 to 20.1 million per individual and from 13.4 to 53.6 million (0.6 –  
86 18.2 unique) per species (Supplementary Table 2, Supplementary Table 6 and  
87 Supplementary Fig. 3c). We observed 4,431,063 SNPs shared among all the eight  
88 species, with the shared SNPs for pairwise comparisons varying from 6,241,176  
89 between European mouflon and snow sheep to 25,195,033 between Asiatic mouflon  
90 and urial (Supplementary Table 4 and Supplementary Table 6). More comparisons of  
91 structural variants (SVs) and copy number variants (CNVs) among species for  
92 uniqueness and sharing are shown in Supplementary Fig. 1c.

93

94 Using pairwise genome-wide  $F_{ST}$ , the species with highest genetic differentiation  
95 were snow sheep and European mouflon, and the ones with least differentiation were  
96 urial and Asiatic mouflon (Supplementary Table 14). The species with the highest  
97 genomic diversity ( $\pi$ ), when only including SNPs with < 10% missing data, were  
98 domestic sheep, Asiatic mouflon, and urial (0.0032 – 0.0044), and the ones with  
99 lowest diversity were snow sheep, bighorn sheep and thinhorn sheep (0.00075 –  
100 0.00078) (Supplementary Fig. 4b). On average, 67.0% of SNPs were located in  
101 intergenic regions, 31.0% in introns, and 0.7% SNPs in exons. The ratio of non-  
102 synonymous to synonymous substitutions ranged from 0.72 in urial and 0.77 in  
103 domestic sheep to 0.88 in European mouflon (Supplementary Table 10). We pooled  
104 the SVs and CNVs across all eight species yielding a high depth of coverage for the

105 shared and unique SVs and CNVs among them (Supplementary Figs. 1a, b and  
106 Supplementary Tables 6 and 7). Annotation of genes overlapped with SVs were  
107 summarized in Supplementary Table 15 (see Supplementary Information)

108

### 109 **Phylogenomic reconstruction among the *Ovis* species**

110 We generated eight high-depth whole pseudo-haploid genomes (see Online Methods),  
111 representing the eight *Ovis* species. Phylogenetic trees were then constructed from  
112 concatenated protein coding regions (CDSs) of autosomes, the X chromosome and the  
113 mitogenome of the assembled genomes, separately (Supplementary Fig. 5). These  
114 trees showed different phylogenetic patterns, but a consistent split between the three  
115 Pachyceriform species (i.e., bighorn, thinhorn and snow sheep) and the others,  
116 consistent with earlier genetic studies <sup>1,21</sup>. Together with the observation that the first  
117 fossil evidence of caprinae is in the Upper Vallesian in Spain <sup>21</sup>, these trees confirmed  
118 a Eurasian origin of the ovine species <sup>15,22</sup>.

119

120 We split the whole genome (one high-depth genome per species, see Materials and  
121 Methods) into 2,462 autosomal and 136 X-chromosomal 1Mb non-overlapping  
122 windows of each species, and estimated Maximum likelihood (ML) trees for these  
123 windows. Three topologies (A, B and C) were observed for 46.1%, 29.1% and 17.8%  
124 of the autosomal trees, 33.8%, 50.0% and 7.4% of the X chromosomal trees,  
125 respectively (Supplementary Fig. 6). The main topologies A and B were also found

126 using the maximum likelihood estimation on the concatenated CDSs (topology A, Fig.  
127 2b) and using consensus methods of the Densitree on the non-overlapping fragments  
128 for autosomes (topology A, Fig. 2a) and X-chromosome (topologies B, Fig. 2a). We  
129 also estimated trees using high-depth individual autosomes and X-chromosome  
130 (Supplementary Fig. 5), which also support topologies A and B, respectively, while  
131 the individual mtDNA tree did not resemble any of the nuclear topologies.

132

133 The minor topologies (e.g., B and C for autosomes; and A and C for X-chromosome)  
134 may reflect local introgression between the species or incomplete lineage sorting (ILS)  
135 of ancestral phylogenies. The three phylogenies of all the 72 individuals using  
136 concatenated CDSs of autosomes (Fig. 2b and Supplementary Fig. 7a), X-  
137 chromosome and mitogenomes (Supplementary Fig. 7) showed seven major clades of  
138 individuals, with European mouflon sequences located among domestic sheep,  
139 compatible with the assumption that European mouflon is a domestic sheep  
140 subspecies<sup>15</sup>. Also, European mouflon and domestic sheep show the same diploid  
141 number of chromosomes ( $2n = 54$ )<sup>1</sup>.

142

143 The phylogenetic trees (Supplementary Figs. 5, 7) and pairwise  $F_{ST}$  (Supplementary  
144 Fig. 8b) showed two clear clusters, one comprised of the European mouflon and  
145 domestic sheep, and another of the Asiatic mouflon and the urial sheep. This is again  
146 compatible with the hypothesis that the European mouflon is a feral derivative of

147 domestic sheep, but it also suggested that the Asiatic mouflons, sampled in Iran, have  
148 diverged considerably from the mouflon ancestors of both the early domestic hair  
149 sheep and the domestic wool sheep of more recent origin <sup>22</sup>.

150

151 A coalescent hidden Markov model (CoalHMM) based on autosomal sequences  
152 indicated a divergence time of domestic sheep and the three Pachyceriform species of  
153 0.244 to 0.270 mya. The argali and the urial were estimated to have diverged from  
154 domestic sheep ~0.124 – 0.150 mya and ~0.077 – 0.092 mya, respectively  
155 (Supplementary Figs. 9 – 11). The divergence time of the Asiatic mouflon and the  
156 urial was estimated to have occurred 0.073 – 0.083 mya, which is earlier than the  
157 divergence between bighorn and thinhorn sheep (~0.036 – 0.052 mya). An Isolation  
158 with Migration (IM) model <sup>23</sup>, which incorporates the impact of migration among  
159 species, gave a similar estimation with the Isolation (I) model <sup>23</sup>.

160

161 The relatively recent divergence of the European mouflon from domestic sheep 5,550  
162 – 5,450 BP (Supplementary Figs. 9 – 11) is concordant with the paleontological  
163 evidence of teeth and bone for a divergence of the Corsican mouflon and domestic  
164 sheep dated at 6,000 – 5,000 BP <sup>24</sup>. Moreover, the coalHMM, IM and I models, with a  
165 filtering thresholds of < 1,000 years and > 20,000 years for the split time <sup>14</sup>, showed a  
166 split time of 12,800 - 8,800 BP between domestic sheep and the Asiatic mouflon. This  
167 estimate is congruent with the estimated domestication time of sheep from the Asiatic

168 mouflon around 9,000 – 11,000 BP, based on archaeological data<sup>4,24</sup>, and also is in  
169 agreement with the time range 12,000 BP- 8,000 BP from the start of exploitation to  
170 the end of domestication<sup>25</sup>.

171

## 172 **Demographic history**

173 The pairwise sequentially Markovian coalescent (PSMC) model found a dramatic  
174 decline in population sizes of these species ~80 – 250 thousand years ago (kya) with a  
175 bottleneck for urial and Asiatic mouflon during 30,000 – 10,000 BP (Fig. 3a),  
176 coinciding with the glacial periods. The subsequent increase in their population sizes  
177 can be ascribed to the prosperity of animal husbandry, agriculture and sedentarism<sup>26</sup>.  
178 The SMC++ analysis showed a decline of all species 10,000 – 1,000 BP. In particular,  
179 we noted European mouflon has a more dramatic decline of  $N_e$  than domestic sheep  
180 6,000 – 5,000 BP, which probably corresponds to the feralization of the European  
181 mouflon (Fig. 3c). The split between domestic sheep and the Asiatic mouflon  
182 occurred during 15,000 – 9,000 BP. During this time period, the Asiatic mouflon  
183 showed an increased  $N_e$ , whereas domestic sheep experienced a severe bottleneck  
184 because of domestication.

185

## 186 **Genetic structure and differentiation**

187 PCA clusters individuals according to the recognized eight species. The cluster of  
188 argali showed significant within-species genetic divergence (Fig. 1b), which was also

189 observed in the admixture pattern at high  $K$  values (Supplementary Fig. 12). The  
190 Asiatic mouflon cluster was dispersed and overlaps partially with the urial cluster (Fig.  
191 1c and Supplementary Fig. 12). The population tree was compatible with the inferred  
192 genetic clustering at  $K=11$  (Supplementary Figs. 12a, b), in which each species is  
193 assigned its own components. The admixture plot may suggest gene flow from argali  
194 (0.06 – 0.76%) and urial (1.4% – 15%) to Asiatic mouflon and possibly from wild  
195 relatives to domestic sheep, such as from European mouflon (5.4 – 5.7% of the  
196 genomes at  $K=6$ ) to Ouessant sheep, which was an isolated island domestic breed  
197 (Supplementary Fig. 12). However, we noted that admixture proportions cannot be  
198 interpreted a direct evidence of admixture.

199  
200 We observed higher levels of linkage disequilibrium (LD) in European mouflon and  
201 domestic sheep than in other species (Fig. 3b). This may be explained by a strong  
202 bottleneck during domestication. The Ouessant sheep<sup>27</sup> clearly had a higher LD than  
203 other domestic breeds, which was consistent with their low genomic diversity (Fig. 3b  
204 and Supplementary Fig. 4). Likewise, the high LD in European mouflon could be  
205 explained by a small population size and possible bottleneck during its reintroduction  
206 from Corsica island to continental Europe<sup>15</sup>.

207

208 **Genomic introgression between wild species**

209 The ABBA-BABA analysis ( $D$ -statistic) was implemented using ANGSD-based on  
210 alignments, which suggested introgressions from bighorn, thinhorn and snow sheep  
211 into their Eurasian relatives such as urial and Asian and European mouflon.  
212 (Supplementary Table 16). Statistical analyses based on variants using Admixtools  
213 (Supplementary Tables 17, 18), TreeMix (Supplementary Figs. 13 and 14) and  $f_d$   
214 statistics (Supplementary Fig. 15 and Supplementary Table 19) consistently showed  
215 significant introgression of snow, bighorn and thinhorn sheep into urial, Asiatic and  
216 European mouflon. Bighorn and thinhorn sheep showed similar patterns of  
217 introgression as snow sheep in terms of several statistic indices, such as percentage  
218 (urial: 6.23 – 6.33%, Asiatic mouflon: 3.63 – 3.7%, European mouflon: 1.43 – 1.47%),  
219 length (urial: 152.68 – 155.1Mb, Asiatic mouflon: 88.96 – 90.7 Mb, European  
220 mouflon: 35.08 – 35.96Mb) and shared genes (urial: 720 – 744, Asiatic mouflon: 449  
221 – 468, European mouflon: 151– 155) of introgression (Supplementary Fig. 15). For  
222 simplicity, we will focus only on the snow sheep introgression. The introgression  
223 events into urial and Asiatic mouflon had a lot of overlap in terms of genomic regions,  
224 while there was very minimal overlap between Asiatic and European mouflon  
225 introgression segments (Supplementary Fig. 15 and Supplementary Table 17).  
226 Furthermore, admixture graph fitting based on  $f_4$  statistics was carried out using the R  
227 package *admixturegraph* (Fig. 4), indicating a very close relationship between wild  
228 sheep of Pachyceriforms and European mouflon.  
229

230 Signatures of introgression were detected in candidate regions overlapping 892 genes  
231 from snow sheep to urial sheep, these genes were significantly (False Discovery Rate,  
232 FDR of 0.05 by the method of Benjamini-Hochberg<sup>28</sup>) enriched for nerve conduction,  
233 energy metabolism, membrane signal transduction, bile secretion, drug addiction and  
234 motor activity using DAVID annotation tools. From snow sheep to Asiatic mouflon or  
235 European mouflon, we found candidate introgression regions covering 497 and 179  
236 genes, respectively (Supplementary Fig. 15a). In European mouflon, the introgressed  
237 genes were enriched for nerve regulation, locomotory behavior, cardiac disease,  
238 insulin secretion, serotonin metabolic process and calcium signaling pathway, while  
239 in Asiatic mouflon the genes were enriched in walking behavior, regulation of cell  
240 differentiation, ovarian steroidogenesis and platelet activation. Noteworthy, we  
241 observed three shared GO terms for the genes involved in the inter-species  
242 introgression events, such as motor, iron channel activity, and dendrite development.  
243 (Supplementary Table 20).

244

245 Among the three sets of introgressed genes between wild species, we observed 12  
246 shared genes (*CYP2J*, *PRUNE2*, *ZNF385B*, *IMMP2L*, *GRIK2*, *HS6ST3*, *USH2A*,  
247 *LOC101111335*, *TMEM132D*, *PAG11*, *PAG3* and *CTNNA3*), which have functions  
248 associated with reproduction and production traits such as follicular development  
249 (*CYP2J*, *IMMP2L*), prolificacy (*GRIK2*), growth (*HS6ST3*), wool and body weight  
250 (*TMEM132D*)<sup>29-34</sup>, and nervous response such as hearing ability evolution (*USH2A*)



251 and nerve development (*PRUNE2*)<sup>35,36</sup>. In particular, shared signatures of  
252 introgression were observed in the PAG gene family, which is involved in pregnancy  
253 detection and placental viability evaluation<sup>37</sup>. Moreover, these genes were  
254 significantly enriched in a GO term (GO:0004190), which consists of pregnancy-  
255 associated glycoproteins (*PAG3* and *PAG11*) related to aspartic-type endopeptidase  
256 activity. We also observed one marginally significantly enriched KEGG pathway of  
257 protein digestion and absorption (oas04974) including the two genes from the PAG  
258 gene family.

259

#### 260 **Dating the introgression from wild relatives to Asiatic mouflon**

261 In addition to the introgression from snow sheep to Asiatic mouflon (Figs. 5a – d)  
262 mentioned above, *D*-statistics,  $f_3$  statistics and TreeMix analysis also detected  
263 signatures of introgression from argali into Asiatic mouflon (Supplementary Tables  
264 16 – 21 and Supplementary Figs. 13 and 15a). Across-genome  $f_d$  values detect 670  
265 and 734 segments introgressed by snow sheep and argali, respectively, corresponding  
266 to a genomic coverage of 3.68% and 3.98%, containing 497 and 540 genes.  
267 (Supplementary Tables 19, 21). The program DATES yielded time estimates for the  
268 snow sheep and argali introgression events of 3,481 and 2,493 generations ago,  
269 respectively. Similar estimates were obtained with Ancestry\_hmm: 3,096 and 2,545  
270 generations ago (Supplementary Fig. 16). With a generation time of 4 years for  
271 Asiatic mouflon, both methods indicated that the introgression from snow sheep, as

272 well as of bighorn and thinhorn sheep, occurred before the domestication 13,924 –  
273 11,580 years BP. In contrast, the introgression from argali to Asiatic mouflon at 9,972  
274 – 10,180 years BP coincides with the domestication process. Because introgression of  
275 argali in domestic sheep is confined to sympatric populations<sup>16,38</sup>, we believe that the  
276 gene flow between argali and Asiatic mouflon did not take place until after the  
277 domestication process, resulting in the first domestic sheep lacking gene flow from  
278 argali. The gene flow from argali was probably also absent in the mouflon population  
279 ancestral to domestic sheep. GO categories and KEGG pathway of snow sheep and  
280 argali introgression into Asiatic mouflon were reported in the Supplementary Table  
281 20.

282

### 283 **Selection signatures in domestic sheep**

284 To detect selection signatures in domestic sheep, we used pairwise differences  
285  $\pi$  ratio ( $\pi_w/\pi_d$ ) > 2.36 and  $F_{ST}$  between domestic sheep and Asiatic mouflon. We  
286 selected the overlap of the top 10% outliers in both methods, identifying 340 windows  
287 as candidate regions for selection. These regions contained a set of 131 selective  
288 functional genes (Supplementary Table 22 and Figs. 5e, f) which were significantly ( $P$   
289  $\leq 0.05$ ) enriched for GO terms involved in the activation of the innate immune  
290 response, positive regulation of defense response to virus by host, ectoderm  
291 development, membrane transport and enzyme activity (Fig. 5g). Of the 131 genes, 62  
292 (47%) overlapped with domestication-related genes of previous studies, and were

293 defined as the candidate domestication genes in sheep (Supplementary Table 23).  
294 Remarkably, from these candidate domestication genes 11 and 13 (15,365 genes on  
295 autosomes, significantly overlapped between two gene lists with Fisher's exact test,  $P$   
296  $< 0.01$ ) have been introgressed into Asiatic mouflon from snow sheep and argali (Figs.  
297 5e, f). These genes were functionally involved in immune response (*HERC3* and  
298 *NFYA*), visual evolution (e.g., *RNF24*), resistance to virus (e.g., *SIN3A*)<sup>39-42</sup>,  
299 production and reproductive traits [e.g. milk and protein yield (*SH3GL3* and  
300 *PAPPA2* )], fecundity (*DNAJB14* and *FSIP2*), body measurement (*SIRT3* and  
301 *SH3GL3*), tail type (*HAO1*), regulation of osteogenesis (*GTF2I*), skeletal muscle  
302 development (*ZNF777*) and lumbar vertebrae number traits (*NR6A1*)<sup>43-52</sup>, and  
303 environmental adaptation [e.g., superior heat tolerance (*PPP2R5E*, *GTF2IRD1* and  
304 *DNAJB14*)]<sup>53-55</sup>.  
305  
306 Of special interest was the introgressed genomic region chr3: 10980301-11211252  
307 which contains gene *NR6A1* and had the highest (OUE, AMUF; SNWS, goat)  $f_d$  value  
308 (Fig. 6). We also computed the mean pairwise sequence divergence ( $d_{xy}$ ) of snow  
309 sheep and Asiatic mouflon or Ouessant sheep. This region also had a reduced mean  
310 pairwise sequence divergences ( $d_{xy}$ ) of snow sheep and Asiatic mouflon, a high  $d_{xy}$  of  
311 snow and Ouessant sheep, and a low differentiation ( $F_{ST}$ ) of Asiatic mouflon and  
312 snow sheep, all indicating introgression of snow sheep into Asiatic mouflon (Figs. 6a  
313 – c).

314

315 For the 11 genes introgressed from snow sheep into Asiatic mouflon, comparisons of  
316 haplotypes of the SNPs in the introgressive regions from argali, snow sheep, Asiatic  
317 mouflon and domestic sheep were shown in Figs. 6d, e. Notably, we found that the  
318 haplotype patterns of Asiatic mouflon strongly resembled those of snow sheep and  
319 argali, but differed strikingly from the patterns observed in the domestic sheep (Figs.  
320 6d, e). Haplotype patterns showed most of the introgressive haplotypes of genes (e.g.,  
321 *NR6A1*, *FSIP2*, *ZNF777*, *RNF24*, *PPP2R5E*) have not been selected and fixed in  
322 domestic sheep (Figs. 6d, e). Since most of the domestication-related genes are  
323 associated with production traits, this scenario could be explained by that  
324 introgressions associated with adaptation rather than production traits have been  
325 mostly selected in the genetic improvement stage after domestication<sup>38</sup>.

326

### 327 **Common introgressions between wild and domestic sheep**

328 In the introgression test (*D*-statistics and TreeMix analysis) between wild and  
329 domestic sheep, we found significant signatures of gene flow from (i) European  
330 mouflon into Ouessant sheep (OUE), (ii) urial and Asiatic mouflon into Shal (SHA),  
331 and (iii) argali into Tibetan sheep (GMA) (Fig. 4a, Supplementary Table 17,  
332 Supplementary Figs. 13, 17). We detected 154 genes located in the introgressed tracts  
333 from European mouflon to Ouessant sheep. These genes were significantly enriched  
334 in the GO terms and KEGG pathways of nerve conduction and development

335 (e.g., GO:0007269, GO:0098793, GO:0043065, GO:0090129, GO:0051965 and  
336 oas04360), cell adhesion (GO:0007156), intracellular signal transduction  
337 (GO:0035556 and oas04024) and walking behavior (GO:0007628) (Supplementary  
338 Table 24).  
339  
340 We identified regions containing 516 and 430 introgressed genes from the Asiatic  
341 mouflon or urial into Shal sheep, 251 of these were shared between the two species  
342 (Supplementary Table 24 and Supplementary Fig. 17). All these genes were  
343 significantly ( $P < 0.05$ ) enriched in the GO terms with functions in tissue and organ  
344 development, reproduction and morphological change. In these tests of introgression  
345 from wild sheep to their sympatric domestic relatives, shared signals were detected in  
346 10 functional genes (e.g., *CCDC67*, *FAT3*, *PCDH15* and *NEURL1*). These 10  
347 common genes have functions associated with arid environment adaptation (*FAT3*)<sup>56</sup>,  
348 immune response (*PCDH15*)<sup>57</sup>, nervous response (*NEURL1*)<sup>58</sup> and disease  
349 susceptibility like noise-induced hearing loss (*PCDH15*)<sup>59</sup>. Moreover, the genes  
350 introgressed from argali to Tibetan sheep were significantly enriched for GO terms in  
351 olfactory bulb development (e.g., *AGTPBP1*, *CRTAC1* and *RPGRIP1L*) and synaptic  
352 transmission (e.g., *GRIK2*, *PARK2* and *SHC3*) (Supplementary Table 24). Notably,  
353 two introgressed genes from Asiatic mouflon to Shal sheep (i.e., *RFX3* and *DNAJB14*)  
354 and one introgressed gene from argali to Tibetan sheep (i.e., *CAMK4*) were identified  
355 to be under domestication (Supplementary Tables 22, 23 and 24).

356

### 357 **Probability of incomplete lineage sorting (ILS)**

358 We estimated the probability of incomplete lineage sorting (ILS) for the introgressed  
359 tracts identified from argali and snow sheep into Asiatic mouflon. The expected  
360 length of a shared ancestral tract (see Online methods) is  $L_{\text{snow}} = 1 / (1.5 \times 10^{-8} \times (2.3 \times$   
361  $10^6 \times 2) / 4) = 57.97$  bp,  $L_{\text{argali}} = 1 / (1.5 \times 10^{-8} \times (1.72 \times 10^6 \times 2) / 4) = 77.52$  bp and the  
362 probability of a length of at least 96,410 bp and 98,037 bp (*i.e.*, the observed  
363 introgressed regions containing the domestication-related genes were 96,410 –  
364 319,834 bp and 98,037 – 639,187 bp) is negligible ( $1 - \text{GammaCDF}(96,410, \text{shape} =$   
365  $2, \text{rate} = 1/L) = 0$ ) (Supplementary Table 25). Similarly, the probability of  
366 introgressed tracts appearing due to ILS detected from snow sheep to European  
367 mouflon and urial, as well as European mouflon, Asiatic mouflon and urial to  
368 domestic sheep were all approach zero (Supplementary Table 26). Thus, the inter-  
369 species introgressions detected above were unlikely due to ILS.

370

### 371 **Discussion**

372 In this study, we generated a novel genomic dataset of high-depth whole-genome  
373 sequences of domestic sheep and all their wild relatives, including the wild ancestor  
374 of sheep (Asiatic mouflon), and the vulnerable (e.g., urial) and near threatened species  
375 (argali and Asiatic mouflon) according to the International Union for Conservation of  
376 Nature (ICUN) Red List. Our genomic data included different types of molecular

377 markers such as SNPs, SVs, CNVs and INDELS, providing an important resource for  
378 the genetic improvement of sheep, as well as for ecological and evolutionary studies  
379 of the wild species.

380

381 This is the first comprehensive and in-depth investigation on phylogeny and  
382 introgressions among the whole *Ovis* genus. Different from previous studies<sup>1,60</sup>,  
383 multiple up-to-date analyses were applied to cross-validate the obtained results. For  
384 example, to better understand the trajectories of connections between admixture  
385 events and phylogenetic relationship across the whole genome, we used sliding  
386 window-based and fitting-based methods to construct the consensus trees.

387 Additionally, we implemented the introgression tests based on several statistical  
388 approaches such as *D*-statistics, *f*-statistics, TreeMix and admixture analyses. Further,  
389 we verified the introgression events (including introgression sources and time) using  
390 the admixturegraph fitting method and dated the introgression time using both model-  
391 based and LD-decay based methods. All the analyses showed accordant results.

392

393 We verified our SNPs based on both statistical and experimental methods, securing  
394 the dataset for the subsequent analysis. By comparing with other species, we found on  
395 average 17.61 million SNPs/per individual (9 – 21 SNPs/kb among the *Ovis* species),  
396 which is less than that in goat (53 – 54 SNPs/kb)<sup>61</sup>, but higher than that in swine (1  
397 SNP per 10.3 kb)<sup>62</sup>.

398

399 Within the *Ovis* species, a relatively low diversity and effective population size (4,000  
400 – 10,000) in the Pachyceriforms may be ascribed to long-term geographic and genetic  
401 isolation<sup>1,21</sup> and is relevant for its conservation. The much less genetic diversity  
402 observed in Pachyceriforms than that in Moufloniforms could be due to (i) the  
403 common ancestor of Pachyceriforms should have migrated out from Eurasia, the  
404 distribution region of Moufloniforms, with genetic drift and differentiation between  
405 each other; and (ii) the genome of domestic sheep has been used as the reference for  
406 SNP mapping, while domestic sheep is phylogenetically further from Pachyceriforms  
407 than Moufloniforms. We observed the highest diversity in Asiatic mouflon ( $\pi =$   
408 0.0044), which was much higher than in domestic sheep ( $\pi = 0.0032$ ). This has been  
409 observed previously<sup>63</sup> and can be explained by the domestication bottleneck<sup>64</sup>. Our  
410 results also showed lower diversity estimates than previous investigations using  
411 whole-genome BeadChip SNPs and mtDNA variation<sup>63,65</sup>. Higher estimates from the  
412 BeadChip could be explained by the ascertainment bias in the chip design.

413

414 Previous molecular evidence for taxonomic classification has so far mostly been  
415 based on mtDNA sequences<sup>1,60,66</sup>. However, pervasive and frequent autosomal  
416 introgressions<sup>14,16</sup> probably accounts for the lower estimates of the coalescence time  
417 compared with those from mtDNA sequences<sup>1,60</sup>. In particular, the evidence from  
418 SMC++, CoalHMM statistics, phylogenetic trees, admixture analysis, and mean



419 population differentiation ( $F_{ST}$ ) index indicated a more recent divergence of European  
420 mouflon and domestic sheep (~5,000 BP), than estimated on the basis of mtDNA  
421 sequences (~21,000 BP)<sup>67</sup>. The recent divergence of European mouflon from  
422 domestic sheep was also supported by archaeological data<sup>24</sup>. Our evidence confirmed  
423 that European mouflon emerged as feral domestic sheep when the earliest wave of  
424 domestic hair sheep, was displaced by a second wave of wool sheep<sup>15,68,69</sup>.

425

426 Also, we obtained a more recent split time between argali and domestic sheep (~0.12 -  
427 0.15 Mya) than earlier estimates. The earlier divergence time was based on  
428 orthologous genes using PAML and the node was calibrated using four fossil records  
429 such as the divergence of the opossum and human (124.6–134.8 million years ago  
430 [Mya]), human and taurine cattle (95.3–113 Mya), taurine cattle and pig (48.3–53.5  
431 Mya), and taurine cattle and goat (18.3–28.5 Mya)<sup>70</sup>. Also, different estimates of 1.72  
432 ± 0.36 Mya and ~ 2.93 Mya were obtained from mitochondrial sequence variations  
433<sup>1,60</sup> using the five fossil calibration time of 18.3–28.5 Ma between Bovinae and  
434 Caprinae, 52–58Ma between Cetacea and hippopotamus, 4 34.1 Ma between baleen  
435 and toothed whales, 42.8–63.8 Ma between Caniformia and Feliformia, and 62.3–71.2  
436 Ma between Carnivora and Perissodactyla. This difference could be due to different  
437 mutation rates of the whole-genomes and mtDNA sequences, and different calibration  
438 time points have been used in different studies. Additionally, we used two model of  
439 coalHMM (Isolation with migration and Isolation model) with full consideration of

440 migration after speciation, and the estimates have always been lower than those  
441 estimated by mtDNA sequences and protein-coding genes<sup>71</sup>. Besides these, the more  
442 recent divergence time estimated here could be attributed to the extensive genomic  
443 introgressions between the sequenced genomes of the two species.  
444  
445 Remarkably, the Admixture and Treemix patterns, as well as  $D$ -statistics and  $f_d$   
446 statistics consistently showed introgression of the Pachyceriforms, comprised by the  
447 snow sheep and its American relatives (bighorn and thinhorn sheep), into European  
448 mouflon. The Pachyceriforms also introgressed Asiatic mouflon, but this was a more  
449 recent event and involved a different set of genomic segments (Supplementary Fig.  
450 15). The introgression percentage as inferred by  $f_d$  statistics were 1.47%, 1.45% and  
451 1.43% from bighorn, thinhorn and snow sheep to European mouflon were, while  
452 higher introgression percentages of 3.7%, 3.63% and 3.68% were from bighorn,  
453 thinhorn and snow sheep to Asiatic mouflon. This indicated that the wild ancestors of  
454 the European mouflon, and consequently also the first hair sheep domesticated,  
455 descend from a population that differs from the Asiatic mouflons in this study, which  
456 were sampled in Iran. In contrast, the Iranian Asiatic mouflons are phylogenetically  
457 diverse and close to urial, which is in line with the mtDNA (Supplementary Fig. 7)  
458 and Y-chromosomal phylogeny<sup>19</sup>. As the range of snow sheep and their American  
459 relatives did not extend to Europe, our results suggested that European mouflons may  
460 have partially descended from a now extinct sheep in Europe and arose through

461 hybridization events between this species and feral domesticated sheep (Fig. 4,  
462 Supplementary Fig. 7). Some wild sheep species live in extreme environments, such  
463 as snow sheep in the extreme cold arctic regions, and argali on the cold Qinghai-  
464 Tibetan Plateau and the Pamir highland. Thus, our data may be relevant for  
465 environmental adaptation. However, it's challenging to confirm the ancient  
466 introgression trajectories based on modern samples, ancient samples of *Ovis* species  
467 are demanding to answer this question.

468

469 Recently, there has been a strong interest in inter-species introgression, particularly  
470 from wild relatives to domestic animals such as pig, goat and sheep<sup>9,10,13,15</sup>. For  
471 example, an earlier study has shown adaptive introgression and selection on domestic  
472 genes in goat<sup>72</sup>. In particular, *MUC6* was found to be introgressed from a West  
473 Caucasian tur-like species into modern goat during domestication, and is nearly fixed  
474 in domestic goat with the function of pathogen resistance<sup>72</sup>. In the *Ovis* genus,  
475 hybridization among species has been documented in previous field and molecular  
476 studies<sup>6,9,66</sup>. However, adaptive introgression from distantly related wild species into  
477 the wild ancestors of domestic animals or into domestic animals has rarely been  
478 investigated<sup>72,73</sup>. Genomic signature of adaptive introgression from European  
479 mouflon into domestic sheep has been previously reported<sup>15</sup>. An earlier whole-  
480 genome SNP analysis suggested that historical introgression from wild relatives is

481 associated with climatic adaptation and that introgressed alleles in *PADI2* have  
482 contributed to resistance to pneumonia in sheep<sup>38</sup>.  
483  
484 A strong signature of adaptive introgression from argali into Tibetan sheep was  
485 detected, and the introgressive genes involved in hypoxia and ultraviolet signaling  
486 pathways (e.g., *HBB* and *MITF*) and associated with morphological traits such as horn  
487 size and shape (e.g., *RXFP2*). The introgressed genes were related to adaptation to the  
488 extreme environment in the Qinghai-Tibetan Plateau<sup>16</sup>. We also identified other  
489 genes in Tibetan sheep introgressed from argali, associated with disease resistance to  
490 pathogens (e.g., *ACTN4*), and with olfactory development (e.g., *AGTPBP1*), and  
491 locomotion (e.g., *OXRI*), possibly related to adaptation to the semi-wild grazing and  
492 anoxic environments in plateau. Furthermore, we found patterns compatible with  
493 adaptive introgression from the Pachyceriform sheep and argali into urial, Asiatic  
494 mouflon and European mouflon. However, it is challenging to validate the function of  
495 these genes the in vivo or vitro in the wild animals.  
496  
497 We detected adaptive introgression from various wild species into Asiatic mouflon,  
498 covering several domestication-related genes. Inspection of these domestication-  
499 related genes (e.g., *KITLG*, *CAMK4*, *NR6A1*, *RNF24*, *MBIP*, *SH3GL3*, *GMDS*,  
500 *EXOC2* and *GTF2I*) indicated their functions associated with important  
501 morphological, physiological and production traits such as litter size and mammary

502 cycle <sup>74,75</sup>, early body weight (e.g., *PLAG1* <sup>76</sup>), regulation of follicular development  
503 (e.g., *NR5A1*; <sup>77</sup>) in sheep. Theoretically, particular functions of these domestication-  
504 related candidate genes indicated relevant traits have been the targets under intensive  
505 selective pressure during the domestication process, which eventually led to  
506 emergence of the typical morphological, production, physiological and behavioral  
507 differences between domestic sheep and their wild ancestors <sup>78</sup>. In practice, the highly  
508 differentiated nonsynonymous mutations in coding regions of the genes should be  
509 functionally important and could be integrated in marker-associated selection and  
510 genomic selection for related traits in future genetic improvement of domestic sheep<sup>17</sup>.

511

## 512 **Conclusions**

513 In conclusion, we estimated the phylogenetic relationships of the sheep species on the  
514 basis of high-depth whole genome sequences. Our results suggested a feral origin of  
515 domestic sheep for European mouflon around 6,000 – 5,000 years BP and a genetic  
516 overlap of urial and the Iranian Asiatic mouflon. We found extensive introgression  
517 events among the *Ovis* species, which partially overlap with regions under selection in  
518 domestic sheep. Our results provide novel insights into changes in the genome  
519 landscapes of domestic sheep and their wild ancestor occurring during and after  
520 domestication.

521

## 522 **Online Methods**

## 523 **Samples and DNA extraction**

524 Seventy-two whole-genome sequences of 6 domestic breeds ( $n = 18$ ) and all wild  
525 species ( $n = 54$ ) of the genus *Ovis* were included in this study (Supplementary Table  
526 1). Here we followed the classification of Nadler et al. (1973) due to the greatest  
527 taxonomy number. The classification was based on morphological traits in  
528 chromosome diploid number. These domestic breeds were selected from sheep which  
529 have showed genomic introgressions from sympatric wild relatives<sup>15,16,38</sup>. Thirty-five  
530 whole-genome sequences were sequenced in this study and 37 were from our previous  
531 studies<sup>17,19</sup>. The 35 genomes generated here consisted of 7 domestic sheep from 3  
532 populations, including Tibetan sheep (GMA, Maqu county, Gansu), Mazekh sheep  
533 (MAZ) in Azerbaijan and Makui sheep (MAK) in Iran, and 28 wild sheep from 5  
534 species, including *O. musimon* ( $n = 3$ ), *O. vignei* ( $n = 5$ ), *O. nivicola* ( $n = 8$ ), *O. dalli*  
535 ( $n = 6$ ) and *O. canadensis* ( $n = 6$ ), all of which were understudied in previous studies.  
536 The 37 public genomes comprised 11 domestic sheep from the following breeds: 3  
537 French Ouessant (OUE) sheep, sampled in the Netherlands, 3 Baidarak sheep (BAJ)  
538 from Russia, 3 Shal sheep (SHA) from Iran, 1 Tibetan sheep and 1 Makui sheep, as  
539 well as 26 wild sheep genomes from 3 species (*O. orientalis*,  $n = 16$ ; *O. ammon*,  $n = 8$   
540 and *O. vignei*,  $n = 2$ ; Supplementary Table 1). Historical information, geographic  
541 distribution, and morphological traits such as body size, horn morphology, color and  
542 pattern of the coat have been used in the definition of species<sup>79</sup> and types and  
543 varieties of hair and wool sheep<sup>27</sup>. Genomic DNA was extracted from the blood or

544 tissue samples using the standard methods of proteinase *K* solution and phenol-  
545 chloroform extraction<sup>80</sup>. DNA samples with a clear band in sepharose gel, an  
546 OD<sub>260</sub>/OD<sub>280</sub> ratio between 1.7 and 2.0 and a concentration at least 20 ng/μL were  
547 used for the library construction.

548

#### 549 **DNA sequencing and read filtering**

550 Whole-genome sequencing was performed using the Illumina HiSeq Xten. At least 1.5  
551 μg of genomic DNA from each sample was sheared to a 180-500 bp range using the  
552 Covaris S220 instrument (Covaris, Woburn, MA, USA) and used for Illumina library  
553 preparation. Sequencing libraries were constructed using the Truseq Nano DNA HT  
554 Sample preparation Kit (Illumina Inc., San Diego, CA, USA) following the  
555 manufacturer's instructions. In brief, DNA fragments were end-repaired, A-tailed,  
556 ligated to paired-end adapter, and the fragments with ~350 bp insert length were  
557 selected for amplification by 8-12 cycles of PCR using the Platinum Pfx Taq  
558 Polymerase Kit (Invitrogen, Carlsbad, CA, USA). PCR products were purified with  
559 the AMPure XP system (Beckman Coulter, Brea, CA, USA), and libraries were  
560 analyzed for the size distribution by the Agilent 2100 Bioanalyzer (Agilent  
561 Technologies, Palo Alto, CA, USA) and quantified in real-time PCR. The constructed  
562 libraries were sequenced on the Illumina HiSeq X Ten platform (Illumina Inc.) and  
563 paired-end 150 bp reads were generated.

564

565 All the newly generated and retrieved whole genomes ( $n = 72$ ) were included in the  
566 following analyses. On average, 95.83% of the sheep reference genome was covered  
567 by the depth of  $\geq 4\times$ , 90.11% was covered by  $\geq 10\times$ , and 46.68% was covered by  
568  $\geq 20\times$ . To obtain reliable reads, we removed the raw paired-reads that meet any of the  
569 following three criteria: (i) unidentified nucleotides (N-content)  $\geq 10\%$ ; (ii) reads pair  
570 with adapters; and (iii)  $> 50\%$  of the read bases with a phred quality (Q) score less  
571 than 5.

572

### 573 **Reads mapping, variant detection, quality control and annotation**

574 Clean reads were mapped to the sheep reference genome OARv4.0  
575 (GCA\_000298735.2) using the BWA v0.7.17 MEM module<sup>81</sup> with the parameters  
576 `bwa -k 32 -M -R`. Duplicates were removed using Picard MarkDuplicates and sorted  
577 using Picard SortSam (<https://broadinstitute.github.io/picard/>). To obtain reliable  
578 alignments, the reads meeting any of the following three criteria were filtered: (i)  
579 unmapped reads; (ii) reads not mapped properly according to the aligner used above;  
580 and (iii) the reads with RMS (root mean square) mapping quality  $< 20$ . Base quality  
581 score recalibration (BQSR) with ApplyBQSR module (default parameters) was used  
582 to detect the systematic errors during the sequencing process.

583

584 Variant discovery was carried out using the Genome Analysis Toolkit (GATK-  
585 v4.0.4.0) best practices pipeline, followed by a joint genotyping method on all



586 samples in the cohort <sup>82</sup>. In summary, we firstly called the variants based on each  
587 sample using Haplotypecaller module in GVCF mode with the parameter -  
588 genotyping-mode DISCOVERY --min-base-quality-score 20 --output-mode  
589 EMIT\_ALL\_SITES --emit-ref-confidence GVCF. Then, we implemented the joint  
590 genotyping procedure by consolidating all the GVCFs with the GenotypeGVCFs  
591 module. Furthermore, we combined all the variants using CombineGVCFs. Variant  
592 sites were identified for each of the eight species, separately. Within each species, the  
593 following successive filtering processes were applied for the variant site and genotype  
594 quality control: First, raw SNPs were hard filtered using the VariantFiltration module  
595 with the strict parameters -filter-expression QUAL < 30.0 || QD < 2.0 || MQ < 40.0 ||  
596 FS > 60.0 || SOR > 3.0 || HaplotypeScore > 13.0 || MQRankSum < -12.5 ||  
597 ReadPosRankSum < -8.0 in each species, separately. We then merged all the 8 variant  
598 datasets from eight species using the bcftools merge function after the bcftools index.  
599 In addition, PLINK v1.9 <sup>83</sup> was used to filter SNPs which meet any of the following  
600 criteria: (i) proportion of missing genotypes among all the individuals over 10% (geno  
601 0.1); (ii) SNPs with minor allele frequency (MAF) higher than 0.05 (maf 0.05); (iii)  
602 SNPs showing an excess of heterozygosity (--hwe 0.001); and (iv) non-biallelic sites.  
603 This yielded a high-quality set of variants including 6,558,545 SNPs were obtained  
604 for the genomic introgression and diversity analyses. For analyzing population genetic  
605 structure, we excluded SNPs in LD with  $r^2 \geq 0.2$  (--indep-pairwise 50 5 0.2). All the

606 SNPs were annotated using the ANNOVAR v.2013-06-21 software<sup>84</sup> and phased  
607 using Shapeit v4.1.3<sup>85</sup>.  
608  
609 **SV detection and annotation**  
610 To identify reliable structural variants (SVs), we detected the SVs by implementing  
611 four independent calling pipelines. First, SVs were detected based on the filtered and  
612 sorted BAM file using novoBreak v.1.1.3<sup>86</sup>, which detects deletions (DEL),  
613 inversions (INV), tandem duplications (DUP) and inter-chromosomal translocations  
614 (TRA). Second, SVs were identified using configManta.py in manta v.1.6.0<sup>87</sup>. Manta  
615 reports SVs as deletions (DEL), inversions (INV), tandem duplications (DUP),  
616 insertions (INS) and inter chromosomal translocations (TRA). Third, SVs were  
617 detected using GRIDSS v2.6.2<sup>88</sup>. SV files in VCF format were then annotated using a  
618 custom R script  
619 ([https://github.com/PapenfussLab/gridss/blob/master/example/simple-event-](https://github.com/PapenfussLab/gridss/blob/master/example/simple-event-annotation.R)  
620 [annotation.R](https://github.com/PapenfussLab/gridss/blob/master/example/simple-event-annotation.R)). GRIDSS generates the same variant types of SVs as those by manta.  
621 These three pipelines utilized the same input of 72 BAM files. Fourth, paired-end  
622 reads were re-mapped to the sheep reference genome (Oar\_v4.0) using the align  
623 module of SpeedSeq v.0.1.2<sup>89</sup>.  
624  
625 In addition, sorted and duplicate-marked BAMs, which contain split reads and  
626 discordant read-pairs, were generated. SVs were then identified from the split reads

627 and discordant pairs using LUMPY v.0.2.13<sup>90</sup>. CNVs were detected from the  
628 difference in read depth using CNVnator v.0.3.3<sup>91</sup>. The inferred breakpoints by  
629 LUMPY were genotyped using SVTyper v.0.1.4<sup>89</sup>. The variant types of SVs detected  
630 by the SpeedSeq framework are the same as those by the GRIDSS pipeline. In these  
631 two pipelines, we generated non-uniquely mappable genomic regions for autosomes  
632 and X chromosomes, respectively, using SNPable  
633 (<http://lh3lh3.users.sourceforge.net/snpable.shtml>), and these regions were masked in  
634 the SV detection by the two methods described above.

635

636 To reduce the false positive rate, SVs in both autosomes and X chromosomes from  
637 the four strategies (novoBreak, manta, GRIDSS and SpeedSeq) which meet the  
638 following seven criteria were retained: (i) at least three split reads (SR) or three  
639 spanning paired-end reads (PE) supporting the given SV event across all the samples;  
640 (ii) SVs with precise breakpoints by novoBreak (flag PRECISE); (iii) SVs passing the  
641 quality filters suggested by NovoBreak, manta and GRIDSS (flag PASS); (iv) SVs  
642 with more than four supporting reads (flag SU) and without ambiguous breakpoints  
643 (flag IMPRECISE) in SpeedSeq; (v) SVs with lengths between 50 bp and 1 Mb; (vi)  
644 SVs without intersections between different variant types; and (vii) SVs identified by  
645 at least two pipelines. For each sample, the shared SVs detected at least by two of the  
646 four independent pipelines were merged using SURVIVOR v.1.0.6<sup>92</sup> with the  
647 parameters 500 2 1 1 0 50.

648

649 SVs were annotated based on their start positions using the package ANNOVAR  
650 v.2013-06-21<sup>84</sup>. Species-unbalanced SVs are defined as SVs which are unevenly  
651 distributed among different species. A two-sided Fisher's exact test was utilized to  
652 determine whether the distribution of each SV is uniform. The *P*-values for all the  
653 SVs were calculated with the Fisher.test function in R followed by the Benjamini–  
654 Hochberg false discovery rate (FDR) adjustment. SVs with  $FDR < 0.05$  were  
655 considered as species-unbalanced.

656

#### 657 **SNPs and CNVs validation**

658 74 randomly selected SNPs of 4-12 individuals were verified by PCR amplifications  
659 and Sanger sequencing. The primers used for the PCRs were designed with the  
660 software Primer Premier 5<sup>93</sup>. The PCR reactions were performed in a total volume of  
661 25  $\mu$ l, consisting of 12.5  $\mu$ l 2 $\times$  Taq MasterMix (Kangwei, Beijing, China), 2  $\mu$ l (10  
662 pmol/ $\mu$ L) reverse and forward primers, 1  $\mu$ l template DNA (30 ng/ $\mu$ L) and 9.5  $\mu$ l  
663 double-distilled water (ddH<sub>2</sub>O) under the reacting condition of initial denaturation at  
664 95 °C for 3 min, 35 cycles for the following three steps, such as denaturation at 95 °C  
665 for 15 sec, annealing at 60 °C for 15 sec, and extension at 72 °C for 30 sec, with a  
666 final extension at 72 °C for 5 min. Following the PCR, the amplification products  
667 were sequenced on the Applied Biosystems 3730XL DNA Analyzer (Life  
668 Technologies, Carlsbad, CA, USA), and the sequencing peaks were checked with the

669 software SEQMAN module of DNASTAR's LASERGENE<sup>94</sup>. Subsequently,  
670 genotypes obtained from the Sanger sequencing were compared with those inferred  
671 by the GATK pipelines (described above) from resequencing data for the same  
672 individuals.  
673  
674 Moreover, 14 randomly selected CNVs (e.g., seven deletions and seven duplications;  
675 Supplementary Table 13) were validated by quantitative real-time PCR (qPCR) or  
676 PCR. Primers designed surrounding the deletions and within the duplications with the  
677 software Primer Premier 5 (Supplementary Table 13). Deletions were genotyped by  
678 PCR amplification and agarose gel electrophoresis. We measured the relative copy  
679 numbers of one deletion and all duplications using qPCR on the QuantStudio<sup>TM</sup> 6  
680 Flex Real-Time PCR System (Life Technologies, Carlsbad, CA, USA) using SYBR  
681 Green kit (Promega, Madison, WI, USA). Following a previous study on sheep<sup>95</sup>,  
682 *DGAT2* gene was used as the internal reference gene. qPCR reaction was in 25  $\mu$ l  
683 volume consisting of 12.5  $\mu$ l 2 $\times$  SYBR Green qPCR Mix (Life Technologies,  
684 Carlsbad, CA, USA), 1  $\mu$ l (10 pmol/ $\mu$ L) each primer (forward and reverse), 2  $\mu$ l  
685 template DNA (30 ng/ $\mu$ l), and 8.5  $\mu$ l ddH<sub>2</sub>O. The thermocycling condition includes an  
686 initial denaturation at 95 °C for 10 min, 40 cycles for the next three steps, such as  
687 denaturation at 95 °C for 15 s, annealing at 60 °C for 15 s and extension at 72 °C for 1  
688 min, and a final extension at 72 °C for 10min.  
689

690 For qPCR, the  $\Delta\Delta C_T$  method<sup>96</sup> was applied to estimate the relative copy numbers.  
691 Equation for  $\Delta\Delta C_T$  value is  $\Delta\Delta C_T = [(C_{T\_segment} - C_{T\_DGAT2})_{target\ sample} - (C_{T\_segment} -$   
692  $C_{T\_DGAT2})_{control\ sample}]$ , where  $C_{T\_segment}$  is threshold cycle ( $C_T$ ) of target CNV segment  
693 and  $C_{T\_DGAT2}$  is the  $C_T$  of the internal reference gene<sup>96</sup>. We also measured the  
694 standard deviation of the  $\Delta\Delta C_T$  value using the formula:  $s = (s_1^2 + s_2^2)^{1/2}$ , where  $s_1$  is  
695 the variance of target  $C_T$  value (3 replications) and  $s_2$  is the variance of the reference  
696  $C_T$  value (3 replications). The value of  $2 \times 2^{-\Delta\Delta C_T}$  between 1.5 and 3 were considered to  
697 most likely represent a normal copy number of 2, below 1.5 or above 3 are considered  
698 as deletions or duplications, respectively<sup>20</sup>. This was used to evaluate the  
699 concordance of calling results obtained from four SVs calling strategies and the  
700 relative copy number from the qPCR.

701

## 702 **Inference of demographic history**

703 We inferred past temporal change in  $N_e$  and population split times using the pairwise  
704 sequentially Markovian coalescent (PSMC) modelling (<http://github.com/lh3/psmc>)  
705 and SMC++ program (<https://github.com/popgenmethods/smcpp#masking>). We  
706 applied the parameters of a generation time ( $g$ ) of 3 years, neutral mutation rate ( $\mu$ ) =  
707  $2.5 \times 10^{-8}$  per base pair per generation, a per-site filter of  $\geq 10$  reads and no more than  
708 25% of missing data<sup>97</sup>, including only autosomes from one high-coverage genomes ( $>$   
709  $18\times$ ) per species (PSMC, Supplementary Table 2) or three individuals per population

710 or species (SMC++). We performed 1,000 bootstrapping simulations to estimate the  
711 variance of  $N_e$ .

712

### 713 **Genomic diversity and population differentiation**

714 For each individual, genome-wide nucleotide diversity was calculated based on the set  
715 of high-quality SNPs ( $n = 6,558,545$ ) using Vcftools v0.1.13 with a window size of  
716 200-kb. Genome-wide pairwise  $F_{ST}$  and  $d_{xy}$  genetic distance matrices between  
717 populations was estimated using in-house python scripts with a window size of 100-  
718 kb and a 20-kb step size. The matrices of pairwise distances were then plotted using  
719 the Corrplot package of R. In order to assess the genome-wide LD patterns of each  
720 species, we calculated  $r^2$  value using the program PopLDdecay v3.30<sup>98</sup>  
721 (<https://github.com/BGI-shenzhen/PopLDdecay>) with the default parameters and after  
722 filtering the sites with more than 10% missing genotypes among the individuals of  
723 each species cohort.

724

### 725 **Population genetic structure and phylogenetic reconstruction**

726 We implemented principal components analysis (PCA) using the Smartpca program<sup>99</sup>  
727 in the software EIGENSOFT v7.2.1<sup>100</sup> without outlier removal iteration  
728 (numoutlieriter: 0) but with the default settings of the other options. The Tracy-  
729 Widom test was used to determine significance of the eigenvectors. The first two  
730 eigenvectors were plotted. We used the Ohana tool suite<sup>101</sup> to infer the global

731 ancestry and the covariance structure of allele frequencies among the species. The  
732 number of ancestry components ( $K$ ) was set in a range from 2 to 11. For each  $K$ , we  
733 terminated the iteration when the likelihood improvement is smaller than 0.001 (-e  
734 0.001). We only reported the ones which reached the best likelihood for each  $K$ .  
735 Population trees at each  $K$  (Supplementary Fig. 12b) were plotted using the program  
736 Nemetree (<http://www.jade-cheng.com/trees/>).  
737  
738 The phylogenetic tree of the nine species was constructed using the maximum  
739 likelihood method implemented in the RAxML v8.2.3<sup>102</sup> with the multiple nucleotide  
740 substitution models. The tree was inferred based on the 12,837 protein coding  
741 sequences (CDS) on autosomes and 513 CDS on X chromosome, separately. We used  
742 the protein-coding gene annotation file from NCBI  
743 ([ftp://ftp.ncbi.nlm.nih.gov/genomes/Ovis\\_aries/GFF/](ftp://ftp.ncbi.nlm.nih.gov/genomes/Ovis_aries/GFF/)). Only CDS with length  
744 multiple of 3 were considered in the phylogenetic inference. The consensus trees  
745 (Supplementary Fig. 5) based on the whole genome was built on the concatenated  
746 CDSs of autosomes (33,868,497 bp), X chromosome (1,331,184 bp) and the whole  
747 mitogenomes (16,616 bp), respectively. Moreover, seventy-two haploidized whole-  
748 genome sequences for all the individuals were generated using the -doFasta3 option in  
749 ANGSD<sup>103</sup> (Fig. 2b and Supplementary Fig. 7), which uses the bases with the highest  
750 effective depth (EBD) and considers both mapping quality and scores for the bases<sup>104</sup>.  
751 To examine the impact of different assembly methods on the phylogenetic inference,



752 we also tested the options of -doFasta 1 and -doFasta 2, which utilize the genomic  
753 sites by randomly selecting the base or selecting the base with the highest depth.  
754  
755 The preliminary tree for the optimization were constructed using the GTRCAT model  
756 in RAxML. Phylogenetic inference of autosomal and X chromosomal sequences was  
757 then implemented based on the first two codon positions and the third codon position  
758 of the whole concatenated coding sequence using the GTRGMMA model in RAxML.  
759 The final trees after 200 bootstrapping replicates were generated using GTRCAT  
760 model in RAxML and returned to the preliminary tree labeled with bootstrap values.  
761 To clarify discordant coalescent events among different tracts in the genome, we split  
762 the whole genome into 1-Mb tracts, which result in 2,598 non-overlapping windows,  
763 respectively. We inferred the ML trees using the GTRGAMMA model. Finally, trees  
764 were built of each 1-Mb windows (Supplementary Fig. 6). Numeration (classification  
765 and ranking) of trees was conducted using all.equal function in R package of Ape  
766 (analyses of phylogenetics and evolution) and plotted by in-house R scripts. The trees  
767 of each tract of autosomes and X chromosome in 1-Mb window were fitted and  
768 visualized by Densitree v2.0.1<sup>105</sup> (Fig. 2a). Mitochondrial sequences between sheep  
769 and goat were blasted using MEGA7<sup>106</sup>. Genomic coordinates of goat were  
770 transferred based on locations of the sheep genome after trimming the poorly mapped  
771 sites. Finally, we merged the 73 mitochondrial sequences in the phylogenetic analysis  
772 with goat as the outgroup.

773

774 **Estimation of split time**

775 Divergence time was estimated locally based on each 1-Mb tracts across autosomes.

776 We used the coalescent hidden Markov model (CoalHMM)<sup>23</sup>, a framework for

777 demographic inference using a sequential Markov coalescent method, to estimate the

778 split time with or without migrations among species. We first converted the pairwise

779 sequence alignments using python scripts `prepare-alignments.py`

780 (<https://github.com/birc-aeH/coalhmm/tree/master/scripts/>). The I-CoalHMM and IM-

781 CoalHMM models were then applied to the dataset of 1-Mb tracts. The two models

782 utilized the genome alignments of two species to calculate the time of speciation. In

783 the I-CoalHMM model, a prior of split time and ancestral effective population size

784 were needed, whereas in IM-CoalHMM model extra migration rates were also needed.

785 The recombination rate was set as 1.5 cM/Mb<sup>107</sup>. We combined the pairwise

786 alignments between species totaling nine pairs and used 1-Mb splitting windows of

787 the whole genomes for each pair and discarded the windows with > 10% missing

788 bases. We filtered the time estimates for the windows using the following criteria: (i)

789 a split time of below 1,000 years or above 10,000 years for European mouflon and

790 sheep, below 1,000 years or above 20,000 years for Asiatic mouflon and sheep or

791 below 10,000 years or above 10 million years for the divergence between the other

792 seven pairs of species (Supplementary Figs. 9 – 11), (ii) a recombination rate below

793 0.1 cM/Mb or above 5 cM/Mb, and (iii) an ancestral effective population size below  
794 5,000 or above 1,000,000<sup>14</sup>.

795

#### 796 **Migration events by TreeMix analysis**

797 To infer migration events among the eight species, we used TreeMix v1.13 to  
798 construct a ML tree with bighorn as the root using the “-noss” option to turn off the  
799 sample size correction, a window size (-K) of 500 SNPs (around 609-kb in this study)  
800 to account for the impact of LD, which is more than the average LD length of  
801 approximately ~150-kb observed in sheep<sup>7</sup>. Blocks with 500 SNPs were resampled  
802 and 100 bootstrap replications were performed. We constructed the ML trees with 0-  
803 11 migration events and corresponding residuals. The proportions of explained  
804 variance (Supplementary Fig. 14) for the migration numbers were calculated using in-  
805 house scripts<sup>108</sup>.

806

#### 807 **Gene flow among species**

808 To infer the ancestral alleles, genomic comparison between domestic sheep (*O. aries*)  
809 and domestic goat (*C. hircus*) was carried out using the LAST v984 program  
810 (<http://last.cbrc.jp/>) (Supplementary Fig. 18). We aligned the sheep reference genome  
811 (Oar\_v4.0) to the goat reference genome (ASR.1) while masking the repeat regions.  
812 Only autosomal one-to-one orthologs were considered in the alignment between the  
813 two species using the lastal module with the parameters of -m 100 -E 0.05. To

814 visualize the corresponding orthologs between species, a synteny plot was created  
815 using the circlize function in the R package. Samtools mpileup and Bcftools call were  
816 then used to call ancestral alleles. We merged these ancestral variants with the  
817 combined SNPs of all the 72 samples using Bcftools merge after indexing the two  
818 datasets. The combined dataset was used to detect introgression among species.

819

820 To detect the potential gene flow among species, we conducted the ABBA-BABA test  
821 ( $D$ -statistics) based on two data panels: single high-depth genomes and high reliable  
822 SNPs among all the individuals. These two datasets can be collated between each  
823 other to reduce variants calling errors. For the first data panel, we performed the  
824 admixture analysis using ANGSD -doAbbababa 1 module with goat as the outgroup  
825 and the block size of 1,000,000 bp. For the second data panel, we examined the  
826 admixture among species using the qpDstats module of AdmixTools<sup>109</sup> and goat as  
827 the outgroup, which is a formal four-population test of admixture. Furthermore, we  
828 performed the three-population test using the qp3pop module of AdmixTools. The  
829 statistical significance of  $D$  value was evaluated using a two-tailed Z test, with  $|Z$ -  
830 score $| > 3$  to be significant<sup>110</sup>. We built the admixture graphs, fitted the graph  
831 parameters and visualized the goodness of fit using admixturegraph<sup>111</sup> package in R.

832

833 **Inference of introgressed genomic regions**

834 To further localize the introgressed genomic regions across the whole-genome, a  
835 window-based Patterson's four-taxon  $D$ -statistic test  $D$  (P1, P2, P3, O) and modified  
836  $f_d$ -statistic ( $f_d$ ) test with 100-kb length windows and 20-kb steps was performed using  
837 the methods of Martin *et al.* (2015)<sup>112</sup>. P1 was the reference population with no gene  
838 flow with P3 and is closer to P2 than P3. Here, goat was used as the outgroup (O),  
839 which was the ancestral population and shared derived alleles with populations P1, P2,  
840 and P3. The significance level ( $p$ -value) of Z-transformed  $f_d$  value was corrected by  
841 multiple testing using the Benjamini–Hochberg FDR method<sup>28</sup>. Windows with  
842 positive  $D$  values and  $p$  values (FDR adjusted)  $< 0.05$  were selected as the  
843 significantly introgressed regions, and the adjacent windows were merged into  
844 concatenated introgressed regions<sup>113</sup>.

845

846 We tested for genomic introgressions between different combinations of species.

847 (i)  $D$  (OUE, target; X, goat): The domestic population of Ouessant (OUE) serves as  
848 the reference population, the goat reference sequence was the outgroup, European  
849 mouflon, Asiatic mouflon or urial were the targets and X (bighorn, thinhorn, argali  
850 and snow sheep) was the to be tested source of introgression.

851 (ii)  $D$  (GMA, target; European mouflon, goat): We selected as reference the old and  
852 native Tibetan sheep (GMA) that has no potential gene flow with European mouflon  
853 and the targets were Ouessant in France, Mazekh in Azerbaijan, Makui and Shal  
854 sheep in Iran.

855 (iii)  $D$  (GMA, target; Asiatic mouflon, goat): the targets were the domestic Mazekh,  
856 Makui and Shal sheep.

857 (iv)  $D$  (OUE, Baidarak; snow sheep, goat): OUE from France was a suitable reference  
858 because its large distance to the range of snow sheep and Baidarak was the target.

859 (v)  $D$  (OUE, target; argali, goat): targets were domestic Tibetan sheep and Russian  
860 Baidarak.

861 (vi)  $D$  (OUE, target; urial goat): targets were domestic Mazekh, Makui and Shal sheep.

862 In addition, we calculated mean pairwise sequence divergence ( $d_{xy}$ ) and  $F_{ST}$

863 value between the target population (P2) and the test population (P3), as well as

864 between the test population (P3) and the reference population (P1). Introgression but

865 not shared ancestry reduces  $d_{xy}$  in the target regions<sup>112</sup>. Similarly, introgressed regions

866 have lower divergence ( $F_{ST}$ ) than other regions.

867

### 868 **Dating introgression events**

869 We dated the time of ancient introgression using DATES<sup>114</sup> and Ancestry\_hmm

870 program<sup>115</sup>. The software DATES computed the weighted LD statistic to infer the

871 population admixture history, which has been developed for human datasets. However,

872 because of the short generation time for sheep, the time estimates using DATES might

873 be younger than expected. Thus, we also applied the Ancestry\_hmm program<sup>115</sup>,

874 using phased data and only SNPs with at least two alleles in the reference populations

875 and applying the following filters: (i) SNPs with allele frequency difference lower

876 than 0.1 between the two reference populations; and (ii) SNPs with allele number less  
877 than 6 in a reference panel. Other parameters were set as default. We set the  
878 proportion of admixture ( $m$ ) according to admixture fraction obtained above by the  $f$   
879 statistics ( $f_d$ ) across the whole genomes. For dating the introgression from bighorn  
880 sheep, thinhorn sheep, snow sheep or argali as source of introgression (reference  
881 population 2) into Asiatic mouflon, we used urial as the ancestor (reference  
882 population 1). We applied a single pulse model for genotype data from each  
883 population and ran 100 bootstrap replicates using a block size of 5,000 SNPs.

884

#### 885 **Incomplete lineage sorting**

886 We calculated the probability of incomplete lineage sortings (ILSs) following the  
887 method in Huerta-Sánchez *et al.* (2014)<sup>116</sup>. Briefly, the expected length of a shared  
888 ancestral sequence is  $L=1/(r \times t)$ . The probability of a length of at least  $m$  follows from  
889  $1 - \text{GammaCDF}(k, \text{shape} = 2, r = 1/L)$ , in which GammaCDF is the Gamma  
890 distribution function,  $r$  is the recombination rate per generation per bp,  $m$  is the length  
891 of introgressed tracts, and  $t$  is the length of the two species branch since divergence.  
892 According to the theoretical expectation, we can exclude the possibility of common  
893 ancestral source when the detected length of tracts ( $m$ )  $> L$  or the probability of a  
894 length of at least  $m$  infinitely approaches zero. Here, we set recombination rate of  $1.5$   
895  $\times 10^{-8}$ <sup>107</sup>, generation time of 4 years for Asiatic mouflon and urial<sup>117</sup> and 3 years for  
896 domestic sheep<sup>118</sup>. We set divergence times of 2.3 mya for snow sheep and Asiatic

897 mouflon, 1.72 mya for argali and Asiatic mouflon<sup>21</sup>, 2.42 mya for the Pachyceriforms  
898 and the Moufloniforms (urial, Asiatic mouflon and European mouflon)<sup>1</sup>, 5–6 kya  
899 for European mouflon and domestic sheep<sup>24</sup>, ~11 kya for Asiatic mouflon and  
900 domestic sheep<sup>4</sup>, and ~1.26 mya<sup>1</sup> for urial and domestic sheep.

901

## 902 **Functional annotation**

903 The genes which overlapping with the concatenated introgressed regions detected by  
904 the modified  $f_d$  value were annotated. We annotated and categorized the functions of  
905 genes using DAVID v6.8<sup>119</sup> (<https://david.ncifcrf.gov/>). FDR, Bonferroni and  
906 Benjamini-Hochberg adjusted  $p$ -values were estimated with  $p$ -value < 0.05 as  
907 statistically significant. GO and KEGG pathway enrichment analyses were  
908 implemented using DAVIDv6.8<sup>119</sup> (<https://david.ncifcrf.gov/>).

909

910 **Ethics statement.** All animal work was conducted according to a permit (No.  
911 IOZ13015) approved by the Committee for Animal Experiments of the Institute of  
912 Zoology, Chinese Academy of Sciences (CAS), China. For domestic sheep, animal  
913 sampling was also approved by local authorities where the samples were taken.

914

915 **Life Sciences Reporting Summary.** Further information on research design is available in the  
916 Nature Research Reporting Summary linked to this article.

917



918 **Data availability.** Raw sequencing data that support the findings of this study will deposit in the  
919 European Nucleotide Archive (ENA) with the corresponding accession codes xxxx and xxxx after  
920 acceptance. Source data for Supplementary Figs.2, 3, 15 are presented in the Supplementary  
921 Tables. Additional data such as raw image files and in-house scripts that support this study are  
922 available from the first authors upon request.

923

## 924 **ACKNOWLEDGEMENTS**

925 This study was financially supported by grants from the National Key Research and  
926 Development Program-Key Projects of International Innovation Cooperation between  
927 Governments (2017YFE0117900), the External Cooperation Program of Chinese  
928 Academy of Sciences (152111KYSB20190027), the National Natural Science  
929 Foundation of China (Nos. 31661143014, 31825024 and 31972527), the Second  
930 Tibetan Plateau Scientific Expedition and Research Program (STEP) ( No.  
931 2019QZKK0501), and the Taishan Scholars Program of Shandong Province (No.  
932 ts201511085). We thank Ming-Shan Wang, Sheng Wang, Hua-Jing Teng, Da-Qi Yu,  
933 Peter Wilton, Débora YC Brandt for their technical help with the statistical analysis.  
934 We express our thanks to the owners of the sheep for donating samples (see  
935 Supplementary Table 1). Thanks are also due to a number of persons for their help  
936 during sample collection.

937

## 938 **AUTHOR CONTRIBUTIONS**

939 M.-H.L. conceived the study. M.-H. L. and R.N. supervised the study. Z.-H.C. and  
940 Y.-X.X. conducted the laboratory work. Z.-H.C., X.-L.X., G.-J.L. contributed the data  
941 analysis. D.-F.W., D.A.G. provided the help for coding. X.-L.X., G.-J.L. performed  
942 the analysis of SVs. Z.-H.C., X.-L.X., Y.-X.X., D.W.C., A.E., J.A.L., R.N. and M.-  
943 H.L. wrote or revised the paper. K.P., I.A., D.W.C., J. K., M.N., V.R. contributed  
944 samples or provided help during the sample collection. All the authors reviewed and  
945 approved the final manuscript.

946

#### 947 **COMPETING FINANCIAL INTERESTS**

948 The authors declare no competing financial interests.

949

#### 950 **References**

951 In Main Text:

952 1. Rezaei, H.R. *et al.* Evolution and taxonomy of the wild species of the genus *Ovis*

953 (Mammalia, Artiodactyla, Bovidae). *Mol. Phylogenet Evol.* **54**, 315-26 (2010).

954 2. Zeder, M.A. Domestication and early agriculture in the Mediterranean Basin:

955 Origins, diffusion, and impact. *Proc. Natl. Acad. Sci.* **105**, 11597-11604

956 (2008).

957 3. Wild, J.P. *ML Ryder: Sheep and man.* London: Duckworth, *Antiquity* **58**, 142-142

958 (1984).

- 959 4. Chessa, B. *et al.* Revealing the history of sheep domestication using retrovirus  
960 integrations. *Science* **324**, 532-6 (2009).
- 961 5. Woronzow, N. *et al.* Chromossomi dikich baranow i proisschojdenije domaschnich  
962 owjez. *Lriroda* **3**, 74-81 (1972).
- 963 6. Bunch, T. & Foote, W. Evolution of the  $2n = 54$  karyotype of domestic sheep (*Ovis*  
964 *aries*). *Ann. Genet. Sel. Anim.* **9**, 509-515 (1977).
- 965 7. Alberto, F.J. *et al.* Convergent genomic signatures of domestication in sheep and  
966 goats. *Nat. Commun.* **9**, 1-9 (2018).
- 967 8. Schröder, O. *et al.* Limited hybridization between domestic sheep and the European  
968 mouflon in Western Germany. *Eur. J. Wildl. Res.* **62**, 307-314 (2016).
- 969 9. Bagirov, V. *et al.* Cytogenetic characteristic of *Ovis ammon ammon*, *O. Nivicola*  
970 *borealis* and their hybrids. *Сельскохозяйственная биология* **6**, 43-48 (2012).
- 971 10. Jones, M.R. *et al.* Adaptive introgression underlies polymorphic seasonal  
972 camouflage in snowshoe hares. *Science* **360**, 1355-1358 (2018).
- 973 11. Chen, N. *et al.* Whole-genome resequencing reveals world-wide ancestry and  
974 adaptive introgression events of domesticated cattle in East Asia. *Nat.*  
975 *Commun.* **9**, 2337 (2018).
- 976 12. Figueiro, H.V. *et al.* Genome-wide signatures of complex introgression and  
977 adaptive evolution in the big cats. *Sci. Adv.* **3**, e1700299 (2017).
- 978 13. Gopalakrishnan, S. *et al.* Interspecific gene flow shaped the evolution of the genus  
979 *Canis*. *Curr. Biol.* **28**, 3441-3449.e5 (2018).

- 980 14. Wu, D.D. *et al.* Pervasive introgression facilitated domestication and adaptation in  
981 the *Bos* species complex. *Nat. Ecol. Evol.* **2**, 1139-1145 (2018).
- 982 15. Barbato, M. *et al.* Genomic signatures of adaptive introgression from European  
983 mouflon into domestic sheep. *Sci. Rep.* **7**, 7623 (2017).
- 984 16. Hu, X.J. *et al.* The Genome landscape of Tibetan sheep reveals adaptive  
985 introgression from argali and the history of early human settlements on the  
986 Qinghai-Tibetan plateau. *Mol. Biol. Evol.* **36**, 283-303 (2019).
- 987 17. Li, X. *et al.* Whole-genome resequencing of wild and domestic sheep identifies  
988 genes associated with morphological and agronomic traits. *Nat. Commun.* **11**,  
989 2815 (2020).
- 990 18. Naval-Sanchez, M. *et al.* Sheep genome functional annotation reveals proximal  
991 regulatory elements contributed to the evolution of modern breeds. *Nat.*  
992 *Commun.* **9**, 859 (2018).
- 993 19. Deng, J. *et al.* Paternal origins and migratory episodes of domestic sheep. *Curr.*  
994 *Biol.* **30**, 4085-4095.e6 (2020).
- 995 20. Zhou, Y. *et al.* Genome-wide copy number variant analysis reveals variants  
996 associated with 10 diverse production traits in Holstein cattle. *BMC Genomics*  
997 **19**, 314 (2018).
- 998 21. Bunch, T.D., Wu, C., Zhang, Y.P. & Wang, S. Phylogenetic analysis of snow  
999 sheep (*Ovis nivicola*) and closely related taxa. *J Hered.* **97**, 21-30 (2006).

- 1000 22. Ciani, E. *et al.* On the origin of European sheep as revealed by the diversity of the  
1001 Balkan breeds and by optimizing population-genetic analysis tools. *Genet. Sel.*  
1002 *Evol.* **52**, 25 (2020).
- 1003 23. Mailund, T. *et al.* A new isolation with migration model along complete genomes  
1004 infers very different divergence processes among closely related great ape  
1005 species. *PLoS Genet.* **8**, e1003125 (2012).
- 1006 24. Vigne, J. D. Zooarchaeology and the biogeographical history of the mammals of  
1007 Corsica and Sardinia since the last ice age. *Mamm. Rev.* **22**, 87-96 (1992).
- 1008 25. Larson, G. *et al.* Current perspectives and the future of domestication studies.  
1009 *Proc. Natl. Acad. Sci. USA* **111**, 6139 (2014).
- 1010 26. Nielsen, R. *et al.* Tracing the peopling of the world through genomics. *Nature* **541**,  
1011 302-310 (2017).
- 1012 27. Mason, I. A World dictionary of livestock breeds, types and varieties. CAB  
1013 International. *Wallingford, UK.* (1996).
- 1014 28. Benjamini, Y. & Hochberg, Y. Controlling the false discovery rate: A practical  
1015 and powerful approach to multiple testing. *J. R. Stat. Soc. Ser. B*  
1016 *(Methodological)* **57**, 289-300 (1995).
- 1017 29. Yang, H. *et al.* Identification and profiling of microRNAs from ovary of estrous  
1018 Kazakh sheep induced by nutritional status in the anestrus season. *Anim.*  
1019 *Reprod. Sci.* **175**, 18-26 (2016).

- 1020 30. Posbergh, C.J., Thonney, M.L. & Huson, H.J. P5017 Identifying genetic regions  
1021 to spring ewes to lamb out of season. *J. Anim. Sci.* **94**, 123-124 (2016).
- 1022 31. Peng, W.F. *et al.* A genome-wide association study reveals candidate genes for the  
1023 supernumerary nipple phenotype in sheep (*Ovis aries*). *Anim. Genet.* **48**, 570-  
1024 579 (2017).
- 1025 32. Jia, C. *et al.* Identification of genetic loci associated with growth traits at weaning  
1026 in yak through a genome-wide association study. *Anim. Genet.* **51**, 300-305  
1027 (2020).
- 1028 33. Liu, G. *et al.* Expression profiling reveals genes involved in the regulation of wool  
1029 follicle bulb regression and regeneration in sheep. *Int. J. Mol. Sci.* **16**, 9152-  
1030 9166 (2015).
- 1031 34. Tarsani, E. *et al.* Discovery and characterization of functional modules associated  
1032 with body weight in broilers. *Sci. Rep.* **9**, 9125 (2019).
- 1033 35. Huang, D. *et al.* Identification of the mouse and rat orthologs of the gene mutated  
1034 in Usher syndrome type IIA and the cellular source of *USH2A* mRNA in retina,  
1035 a target tissue of the disease. *Genomics* **80**, 195-203 (2002).
- 1036 36. Iwama, E. *et al.* Cancer-related *PRUNE2* protein is associated with nucleotides  
1037 and is highly expressed in mature nerve tissues. *J. Mol. Neurosci.* **44**, 103-14  
1038 (2011).

- 1039 37. Wallace, R.M., Pohler, K.G., Smith, M.F. & Green, J.A. Placental *PAGs*: gene  
1040 origins, expression patterns, and use as markers of pregnancy. *Reproduction*  
1041 **149**, R115-26 (2015).
- 1042 38. Cao, Y.H. *et al.* Historical introgression from wild relatives enhanced climatic  
1043 adaptation and resistance to pneumonia in sheep. *Mol. Biol. Evol.* **38**, 838-855  
1044 (2020).
- 1045 39. Al Kalaldehy, M., Gibson, J., Lee, S.H., Gondro, C. & van der Werf, J.H.J.  
1046 Detection of genomic regions underlying resistance to gastrointestinal  
1047 parasites in Australian sheep. *Genet. Sel. Evol.* **51**, 37 (2019).
- 1048 40. Wong, D. *et al.* Genomic mapping of the MHC transactivator *CIITA* using an  
1049 integrated ChIP-seq and genetical genomics approach. *Genome Biol.* **15**, 494  
1050 (2014).
- 1051 41. Wang, W. *et al.* Deep genome resequencing reveals artificial and natural selection  
1052 for visual deterioration, plateau adaptability and high prolificacy in Chinese  
1053 domestic sheep. *Front. Genet.* **10**, 300-300 (2019).
- 1054 42. Bouloy, M. & Weber, F. Molecular biology of rift valley Fever virus. *Open Virol.*  
1055 *J.* **4**, 8-14 (2010).
- 1056 43. Liu, L.L., Fang, C. & Liu, W.J. Identification on novel locus of dairy traits of  
1057 Kazakh horse in Xinjiang. *Gene* **677**, 105-110 (2018).
- 1058 44. Taye, M. *et al.* Exploring evidence of positive selection signatures in cattle breeds  
1059 selected for different traits. *Mamm. Genome* **28**, 528-541 (2017).

- 1060 45. Yurchenko, A.A. *et al.* High-density genotyping reveals signatures of selection  
1061 related to acclimation and economically important traits in 15 local sheep  
1062 breeds from Russia. *BMC Genomics* **20**, 294 (2019).
- 1063 46. Jin, Y. *et al.* Detection of insertions/deletions within *SIRT1*, *SIRT2* and *SIRT3*  
1064 Genes and their associations with body measurement traits in cattle. *Biochem.*  
1065 *Genet.* **56**, 663-676 (2018).
- 1066 47. Yuan, Z. *et al.* Selection signature analysis reveals genes associated with tail type  
1067 in Chinese indigenous sheep. *Anim. Genet.* **48**, 55-66 (2017).
- 1068 48. Håkelién, A.M. *et al.* The regulatory landscape of osteogenic differentiation. *Stem*  
1069 *Cells* **32**, 2780-93 (2014).
- 1070 49. Zhang, X. *et al.* Association analysis of polymorphism in the *NR6A1* gene with  
1071 the lumbar vertebrae number traits in sheep. *Genes Genom.* **41**, 1165-1171  
1072 (2019).
- 1073 50. Ehrmann, I. *et al.* An ancient germ cell-specific RNA-binding protein protects the  
1074 germline from cryptic splice site poisoning. *eLife* **8**, e39304 (2019).
- 1075 51. Cardoso, T.F. *et al.* RNA-seq based detection of differentially expressed genes in  
1076 the skeletal muscle of Duroc pigs with distinct lipid profiles. *Sci. Rep.* **7**,  
1077 40005 (2017).
- 1078 52. Petersen, J.L. *et al.* Genome-wide analysis reveals selection for important traits in  
1079 domestic horse breeds. *PLoS genet.* **9**, e1003211-e1003211 (2013).



- 1080 53. Taye, M. *et al.* Exploring the genomes of East African Indicine cattle breeds  
1081 reveals signature of selection for tropical environmental adaptation traits.  
1082 *Cogent Food & Agric.* **4**, 1552552 (2018).
- 1083 54. Li, Y. *et al.* Heat stress-responsive transcriptome analysis in the liver tissue of Hu  
1084 sheep. *Genes* **10**, 395 (2019).
- 1085 55. Lyon, M.S. & Milligan, C. Extracellular heat shock proteins in neurodegenerative  
1086 diseases: New perspectives. *Neurosci. Lett.* **711**, 134462 (2019).
- 1087 56. Yang, J. *et al.* Whole-genome sequencing of native sheep provides insights into  
1088 rapid adaptations to extreme environments. *Mol. Biol. Evol.* **33**, 2576-2592  
1089 (2016).
- 1090 57. Atlija, M., Arranz, J.-J., Martinez-Valladares, M. & Gutiérrez-Gil, B. Detection  
1091 and replication of QTL underlying resistance to gastrointestinal nematodes in  
1092 adult sheep using the ovine 50K SNP array. *Genet. Sel. Evol.* **48**, 4 (2016).
- 1093 58. Nakamura, H. *et al.* Identification of a human homolog of the *Drosophila*  
1094 neuralized gene within the 10q25.1 malignant astrocytoma deletion region.  
1095 *Oncogene* **16**, 1009-1019 (1998).
- 1096 59. Zong, S. *et al.* Association of polymorphisms in heat shock protein 70 genes with  
1097 the susceptibility to noise-induced hearing loss: A meta-analysis. *PLoS One* **12**,  
1098 e0188195 (2017).
- 1099 60. Lv, F.H. *et al.* Mitogenomic meta-analysis identifies two phases of migration in  
1100 the history of Eastern Eurasian sheep. *Mol. Biol. Evol.* **32**, 2515-2533 (2015).

- 1101 61. Tarekegn, G.M. *et al.* Ethiopian indigenous goats offer insights into past and  
1102 recent demographic dynamics and local adaptation in sub-Saharan African  
1103 goats. *Evol. Appl.* **14**, 1716-1731 (2021).
- 1104 62. Fang, Y. *et al.* Genome-wide detection of runs of homozygosity in Laiwu pigs  
1105 revealed by sequencing data. *Front. Genet.* **12**, 629966-629966 (2021).
- 1106 63. Benjelloun, B. *et al.* An evaluation of sequencing coverage and genotyping  
1107 strategies to assess neutral and adaptive diversity. *Mol. Ecol. Resour.* **19**,  
1108 1497-1515 (2019).
- 1109 64. Zhang, J. *et al.* Effect of domestication on the genetic diversity and structure of  
1110 *Saccharina japonica* populations in China. *Sci. Rep.* **7**, 42158 (2017).
- 1111 65. Demirci, S. *et al.* Mitochondrial DNA diversity of modern, ancient and wild sheep  
1112 (*Ovis gmelinii anatolica*) from Turkey: new insights on the evolutionary  
1113 history of sheep. *PLoS One* **8**, e81952 (2013).
- 1114 66. Nadler, C.F., Hoffmann, R.S. & Woolf, A. G-band patterns as chromosomal  
1115 markers, and the interpretation of chromosomal evolution in wild sheep (*Ovis*).  
1116 *Experientia* **29**, 117-119 (1973).
- 1117 67. Sanna, D. *et al.* The first mitogenome of the Cyprus mouflon (*Ovis gmelini*  
1118 *ophion*): New insights into the phylogeny of the genus *Ovis*. *PLOS ONE* **10**,  
1119 e0144257 (2015).
- 1120 68. Poplin, F. Origine du Mouflon de Corse dans une nouvelle perspective  
1121 paléontologique: par marronnage. *Ann. Genet. Sel. Anim.* **11**, 133-143 (1979).

- 1122 69. Vigne, J.D., Carrère, I., Briois, F. & Guilaine, J. The early process of mammal  
1123 domestication in the Near East: New evidence from the pre-Neolithic and pre-  
1124 Pottery Neolithic in Cyprus. *Curr. Anthropol.* **52**, S255-S271 (2011).
- 1125 70. Yang, Y. *et al.* Draft genome of the Marco Polo Sheep (*Ovis ammon polii*).  
1126 *GigaScience* **6**(2017).
- 1127 71. Carling, M.D., Lovette, I.J. & Brumfield, R.T. Historical divergence and gene  
1128 flow: Coalescent analyses of mitochondrial, autosomal and sex-linked loci in  
1129 *Passerina Buntings*. *Evolution* **64**, 1762-1772 (2010).
- 1130 72. Zheng, Z. *et al.* The origin of domestication genes in goats. *Sci. Adv.* **6**, eaaz5216  
1131 (2020).
- 1132 73. Fan, R. *et al.* Genomic analysis of the domestication and post-Spanish conquest  
1133 evolution of the llama and alpaca. *Genome Biol.* **21**, 159 (2020).
- 1134 74. An, X. *et al.* Two mutations in the 5' flanking region of the *KITLG* gene are  
1135 associated with litter size of dairy goats. *Anim. Genet.* **46**, 308-311 (2015).
- 1136 75. Zhang, J. *et al.* Expression and polymorphisms of *KITLG* gene and their  
1137 association with litter size in sheep (*Ovis aries*). *J. Agric. Biotechnol.* **25**, 893-  
1138 900 (2017).
- 1139 76. Pan, Y. *et al.* Indel mutations of sheep *PLAG1* gene and their associations with  
1140 growth traits. *Anim. Biotechnol.* **7**, 1-7 (2021).
- 1141 77. Li, Y. *et al.* Mutation-388 C> G of *NR5A1* gene affects litter size and promoter  
1142 activity in sheep. *Anim.Reprod. Sci.* **196**, 19-27 (2018).

- 1143 78. Hunter, P. The genetics of domestication: Research into the domestication of  
1144 livestock and companion animals sheds light both on their "evolution" and  
1145 human history. *EMBO reports* **19**, 201-205 (2018).
- 1146 79. Fedosenko, A.K. & Blank, D.A. *Ovis ammon*. *Mammalian Species* **2005**, 1-15  
1147 (2005).
- 1148 In online methods:
- 1149 80. Sambrook, J. & Russell, D. Molecular cloning: A laboratory manual. Cold Spring  
1150 Harbor Laboratory Press, New York, (2001).
- 1151 81. Li, H. & Durbin, R. Fast and accurate short read alignment with Burrows-Wheeler  
1152 transform. *Bioinformatics* **25**, 1754-60 (2009).
- 1153 82. McKenna, A. *et al.* The Genome Analysis Toolkit: a MapReduce framework for  
1154 analyzing next-generation DNA sequencing data. *Genome Res.* **20**, 1297-1303  
1155 (2010).
- 1156 83. Chang, C.C. *et al.* Second-generation PLINK: rising to the challenge of larger and  
1157 richer datasets. *Gigascience* **4**, 7 (2015).
- 1158 84. Wang, K., Li, M. & Hakonarson, H. ANNOVAR: functional annotation of genetic  
1159 variants from high-throughput sequencing data. *Nucleic. Acids. Res.* **38**, e164  
1160 (2010).
- 1161 85. Delaneau, O. & Marchini, J. Integrating sequence and array data to create an  
1162 improved 1000 Genomes Project haplotype reference panel. *Nat. Commun.* **5**,  
1163 3934 (2014).

- 1164 86. Chong, Z. *et al.* novoBreak: local assembly for breakpoint detection in cancer  
1165 genomes. *Nat. Methods* **14**, 65-67 (2017).
- 1166 87. Chen, X. *et al.* Manta: rapid detection of structural variants and indels for  
1167 germline and cancer sequencing applications. *Bioinformatics* **32**, 1220-2  
1168 (2016).
- 1169 88. Cameron, D.L. *et al.* GRIDSS: sensitive and specific genomic rearrangement  
1170 detection using positional de Bruijn graph assembly. *Genome Res.* **27**, 2050-  
1171 2060 (2017).
- 1172 89. Chiang, C. *et al.* SpeedSeq: ultra-fast personal genome analysis and interpretation.  
1173 *Nat. Methods* **12**, 966-8 (2015).
- 1174 90. Layer, R.M., Chiang, C., Quinlan, A.R. & Hall, I.M. LUMPY: a probabilistic  
1175 framework for structural variant discovery. *Genome Biol.* **15**, R84 (2014).
- 1176 91. Abyzov, A., Urban, A.E., Snyder, M. & Gerstein, M. CNVnator: an approach to  
1177 discover, genotype, and characterize typical and atypical CNVs from family  
1178 and population genome sequencing. *Genome Res.* **21**, 974-84 (2011).
- 1179 92. Jeffares, D.C. *et al.* Transient structural variations have strong effects on  
1180 quantitative traits and reproductive isolation in fission yeast. *Nat. Commun.* **8**,  
1181 14061 (2017).
- 1182 93. Lalitha, S. Primer Premier 5. *Biotech Software & Internet Report* **1**, 270-272  
1183 (2000).

- 1184 94. Swindell, S.R. & Plasterer, T.N. SEQMAN. Contig assembly. *Methods Mol. Biol.*  
1185 *(Clifton, N.J.)* **70**, 75-89 (1997).
- 1186 95. Yuan, C. *et al.* A global analysis of CNVs in Chinese indigenous fine-wool sheep  
1187 populations using whole-genome resequencing. *BMC Genomics* **22**, 78 (2021).
- 1188 96. Schmittgen, T.D. & Livak, K.J. Analyzing real-time PCR data by the comparative  
1189 CT method. *Nat. Protoc.* **3**, 1101-1108 (2008).
- 1190 97. Nadachowska-Brzyska, K., Burri, R., Smeds, L. & Ellegren, H. PSMC analysis of  
1191 effective population sizes in molecular ecology and its application to black-  
1192 and-white *Ficedula* flycatchers. *Mol. Ecol.* **25**, 1058-1072 (2016).
- 1193 98. Zhang, C., Dong, S.S., Xu, J.Y., He, W.M. & Yang, T.L. PopLDdecay: a fast and  
1194 effective tool for linkage disequilibrium decay analysis based on variant call  
1195 format files. *Bioinformatics* **35**, 1786-1788 (2019).
- 1196 99. Patterson, N., Price, A.L. & Reich, D. Population structure and eigenanalysis.  
1197 *PLoS Genet.* **2**, e190 (2006).
- 1198 100. Price, A.L., Zaitlen, N.A., Reich, D. & Patterson, N. New approaches to  
1199 population stratification in genome-wide association studies. *Nat. Rev. Genet.*  
1200 **11**, 459-63 (2010).
- 1201 101. Cheng, J.Y., Racimo, F. & Nielsen, R. Ohana: detecting selection in multiple  
1202 populations by modelling ancestral admixture components. *bioRxiv*, 546408  
1203 (2019).

- 1204 102. Stamatakis, A. RAxML version 8: a tool for phylogenetic analysis and post-  
1205 analysis of large phylogenies. *Bioinformatics* **30**, 1312-3 (2014).
- 1206 103. Korneliussen, T.S., Albrechtsen, A. & Nielsen, R. ANGSD: Analysis of Next  
1207 Generation Sequencing Data. *BMC Bioinform.* **15**, 356 (2014).
- 1208 104. Wang, Y., Lu, J., Yu, J., Gibbs, R.A. & Yu, F. An integrative variant analysis  
1209 pipeline for accurate genotype/haplotype inference in population NGS data.  
1210 *Genome Res.* **23**, 833-42 (2013).
- 1211 105. Bouckaert, R.R. DensiTree: making sense of sets of phylogenetic trees.  
1212 *Bioinformatics* **26**, 1372-3 (2010).
- 1213 106. Kumar, S., Stecher, G. & Tamura, K. MEGA7: Molecular Evolutionary Genetics  
1214 Analysis Version 7.0 for Bigger Datasets. *Mol. Biol. Evol.* **33**, 1870-1874  
1215 (2016).
- 1216 107. Petit, M. *et al.* Variation in recombination rate and its genetic determinism in  
1217 sheep populations. *Genetics* **207**, 767-784 (2017).
- 1218 108. Pickrell, J.K. & Pritchard, J.K. Inference of population splits and mixtures from  
1219 genome-wide allele frequency data. *PLoS Genet.* **8**, e1002967 (2012).
- 1220 109. Patterson, N. *et al.* Ancient admixture in human history. *Genetics* **192**, 1065-93  
1221 (2012).
- 1222 110. Durand, E.Y., Patterson, N., Reich, D. & Slatkin, M. Testing for ancient  
1223 admixture between closely related populations. *Mol. Biol. Evol.* **28**, 2239-52  
1224 (2011).

- 1225 111. Leppala, K., Nielsen, S.V. & Mailund, T. admixturegraph: an R package for  
1226 admixture graph manipulation and fitting. *Bioinformatics* **33**, 1738-1740  
1227 (2017).
- 1228 112. Martin, S.H., Davey, J.W. & Jiggins, C.D. Evaluating the use of ABBA-BABA  
1229 statistics to locate introgressed loci. *Mol. Biol. Evol.* **32**, 244-57 (2015).
- 1230 113. Teng, H. *et al.* Population genomics reveals speciation and introgression between  
1231 brown Norway rats and their sibling species. *Mol. Biol. Evol.* **34**, 2214-2228  
1232 (2017).
- 1233 114. Loh, P.R. *et al.* Inferring admixture histories of human populations using linkage  
1234 disequilibrium. *Genetics* **193**, 1233-54 (2013).
- 1235 115. Corbett-Detig, R. & Nielsen, R. A hidden markov model approach for  
1236 simultaneously estimating local ancestry and admixture time using next  
1237 generation sequence data in samples of arbitrary ploidy. *PLoS Genet.* **13**,  
1238 e1006529 (2017).
- 1239 116. Huerta-Sanchez, E. *et al.* Altitude adaptation in Tibetans caused by introgression  
1240 of Denisovan-like DNA. *Nature* **512**, 194-7 (2014).
- 1241 117. Guerrini, M. *et al.* Molecular DNA identity of the mouflon of Cyprus (*Ovis*  
1242 *orientalis ophion*, *Bovidae*): Near Eastern origin and divergence from Western  
1243 Mediterranean conspecific populations. *System. Biodivers.* **13**, 472-483 (2015).



- 1244 118. Zhao, Y.X. *et al.* Genomic reconstruction of the history of native sheep reveals  
1245 the peopling patterns of nomads and the expansion of early pastoralism in East  
1246 Asia. *Mol. Biol. Evol.* **34**, 2380-2395 (2017).
- 1247 119. Huang da, W., Sherman, B.T. & Lempicki, R.A. Systematic and integrative  
1248 analysis of large gene lists using DAVID bioinformatics resources. *Nat.*  
1249 *Protoc.* **4**, 44-57 (2009).
- 1250

## Tables

**Table 1** Summary information of whole-genome variations identified in *Ovis* species.

| Sequence quality/<br>Variation type | <i>O.aries</i><br>(n=18) | <i>O.orientalis</i><br>( n=17 ) | <i>O.musimon</i><br>(n=3) | <i>O.vignei</i><br>(n=7) | <i>O.ammon</i><br>(n=8) | <i>O.nivicola</i><br>(n=8) | <i>O.dalli</i><br>(n=6) | <i>O.canadensis</i><br>(n=6) |
|-------------------------------------|--------------------------|---------------------------------|---------------------------|--------------------------|-------------------------|----------------------------|-------------------------|------------------------------|
| SNPs                                | 31,535,487               | 53,618,832                      | 13,360,034                | 30,125,980               | 25,160,871              | 22,845,295                 | 23,185,374              | 23,069,044                   |
| INDELS                              | 4,361,226                | 7,173,026                       | 3,180,207                 | 4,748,458                | 4,541,250               | 4,204,319                  | 4,301,920               | 4,255,087                    |
| SVs                                 | 123,594                  | 161,892                         | 55,950                    | 81,003                   | 84,587                  | 75,375                     | 77,304                  | 75,480                       |
| CNVs                                | 74,672                   | 92,366                          | 37,250                    | 56,216                   | 52,236                  | 48,705                     | 48,794                  | 48,527                       |
| Duplications                        | 1,814                    | 2,403                           | 571                       | 915                      | 1,185                   | 1,071                      | 1,122                   | 1,070                        |
| Deletions                           | 72,858                   | 89,963                          | 36,679                    | 55,301                   | 51,051                  | 47,634                     | 47,672                  | 47,457                       |
| Insertions                          | 11,685                   | 12,981                          | 6,517                     | 8,126                    | 8,867                   | 7,339                      | 8,954                   | 8,727                        |
| Inversions                          | 746                      | 1,011                           | 311                       | 499                      | 600                     | 583                        | 580                     | 576                          |
| Translocations                      | 36,491                   | 55,534                          | 11,872                    | 16,162                   | 22,884                  | 18,748                     | 18,976                  | 17,650                       |
| Average Depth (X)                   | 19.25                    | 27.11                           | 18.89                     | 19.77                    | 17.78                   | 17.8                       | 19.43                   | 18.88                        |
| Coverage Rate (%)                   | 97.2                     | 98.22                           | 97.03                     | 97.1                     | 96.79                   | 96.54                      | 96.65                   | 96.62                        |

## Figure Legends

### **Figure 1 Geographic distribution and population structure of *Ovis* species. (a)**

Geographic map of sample location and wild sheep species distribution based on the IUCN Red list (<https://www.iucnredlist.org>). Here we adopted the classification of Nadler *et al.* 1973. **(b)** Principal Component Analysis (PCA) of *Ovis* species. **(c)** Admixture plot using Ohana software for K from 4 to 6. Population tree of each K indicates affinity of each ancestral component (Below, right).

**Figure 2 Phylogeny of *Ovis* genus.** Prevalent discordance among segmental trees on autosomes and X chromosome, totaling 2,598 1-Mb segments. The segmental trees were visualized by Densitree. Consensus tree topologies of each category are shown in purple. **(b)** Phylogenetic tree of whole autosomal coding region (CDS) of 72

individuals using RAxML. Arrows marked the introgression pairs and the corresponding  $Z$  score based on the four populations test ( $D$  statistics), see Supplementary Table 17. Pink arrows indicate the admixed pairs which have been selected by three or more of the tests such as  $D$  statistics, TreeMix,  $f$  statistics and admixture analysis, while purple arrows indicate the introgression pairs detected in two or less of the tests.

**Figure 3 Demographic inference.** (a) Ancestral dynamic change of effective population size inferred by PSMC program for eight high-depth genomes. Colors of the lines indicate different species. Plots were scaled using a mutation rate of  $2.5 \times 10^{-8}$  per site per generation and generation time ( $g$ ) of 3. Light green shading indicates interglacials (IG) in the Pleistocene and Holocene, and light blue marked as LGM the Last Glacial Maximum and gray shading indicates the mid-Pleistocene transition (MPT) and the Plio-Pleistocene transition (PPT). (b) LD decay analysis for seven wild species (marked as rectangles) and six domestic breeds (marked as squares). (c) Dynamic change of effective population size inferred by the SMC++ program for Asiatic and European mouflon and six domestic breeds (left panel) and seven wild species (right panel), the blue shading indicates the period of domestication and the gray vertical dashed line is the potential split time point of European and Asiatic mouflon. (d) Dynamic change of effective population size over time for all *Ovis* species.

**Figure 4 Admixture graph fitting for introgression from the Pachyceriforms into European mouflon.** (a)  $D$  statistics of European mouflon (EMUF) with the Pachyceriforms [snow sheep (SNWS), bighorn (BIGS) and thinhorn (THNS)]. (b) Prior phylogeny of wild species in *Ovis* genus. (c) Goodness of fit of  $f_4$  statistics. (d) Admixture graph.

**Figure 5 Local inference and annotation of introgression signals from snow sheep to Asiatic mouflon.** (a) Treemix analysis when  $m=9$ . (b, d)  $f_3$  statistics and  $D$  statistics of Asiatic mouflon (AMUF) with snow sheep (SNWS) pairs. Double dashed line marked as the range of threshold from -3 to 3. (c) Demographic diagram of admixture from snow sheep (*O.nivicola*) to Asiatic mouflon (*O.orientalis*). (e) Introgressed regions identified in the Asiatic mouflon genome. A modified  $f$ -statistic ( $f'_d$ ) for (OUE,AMUF;SNWS,goat),  $\pi$  ratio ( $\pi_w/\pi_d$ , i.e.  $\pi$  of Asiatic mouflon/and  $\pi$  of all the domestic sheep) and  $F_{ST}$  between Asiatic mouflon and all the domestic sheep for 100-kb windows with 20-kb steps is plotted along the chromosomes. Each dot represents a 100-kb window. For  $f$ -statistic, green and blue dots above the red horizontal line correspond to the FDR 5% and FDR 1% significance level thresholds, respectively. The regions containing genes among three indexes ( $f'_d$ ,  $\pi$  ratio and  $F_{ST}$ ) are plotted in red dots. For the  $\pi$  ratio ( $\pi_w/\pi_d$ ) and  $F_{ST}$ , 340 domestic selection related windows are plotted, and 62 verified candidate domestication genes are marked in the plot. Overlapped genes ( $n=11$ ) with  $f$ -statistic are marked in purple. (f) Venn diagram of overlapping genes ( $n=11$  for snow sheep and  $n=13$  for argali) between introgressed

genes (n=497 for snow sheep and n=540 for argali) and candidate domestication genes (n=62). **(g)** GO enrichment for 62 overlapped domestication genes with the previous studies.

**Figure 6 Local inference of genomic region at genes introgressed from snow sheep (SNWS) into Asiatic mouflon (AMUF).** **(a)**  $f$  statistics ( $f_d$ ) based on (OUE, AMUF; SNWS, goat) comparison with (OUE, AMUF; ARGS, goat) and (OUE, ARGS; SNWS, goat) calculated for 100-kb windows with 20-kp steps across the genome for Asiatic mouflon. Each dot represented a 100-kb window, and the dashed line indicated the significance threshold ( $P < 0.05$ ). **(b)** Population differentiation ( $F_{ST}$ ) around the introgressive genomic region between recipient (Asiatic mouflon) and donor (snow sheep). **(c)** Mean pairwise sequence divergence ( $d_{xy}$ ) of the introgression region between snow sheep and either Asiatic mouflon or Ouessant (OUE) domestic sheep population. **(d, e)** Haplotype patterns among all the domestic sheep, Asiatic mouflon, argali and snow sheep for the 11 genomic regions. Genes within the introgressed segments were marked upon haplotypes.

## Figures

### Figure 1

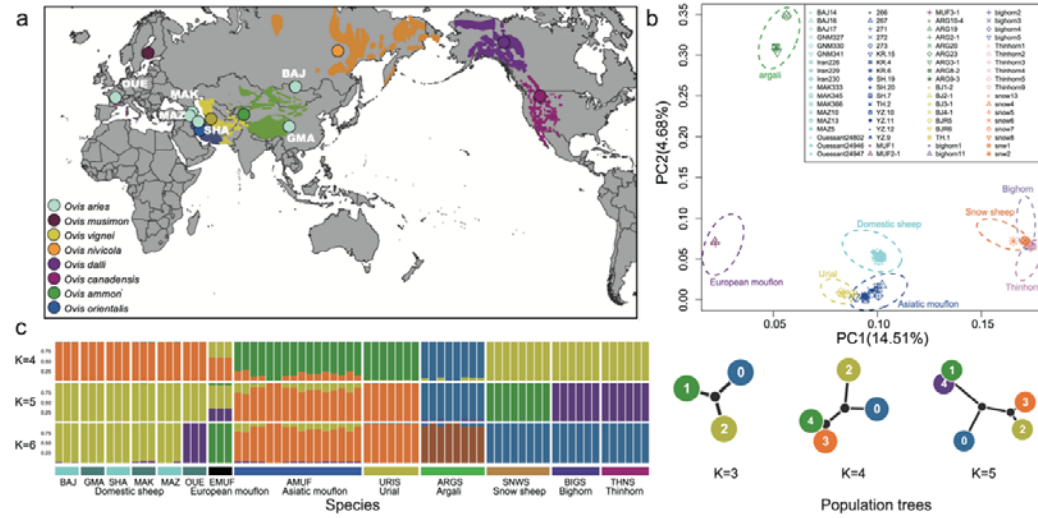

**Figure 2**

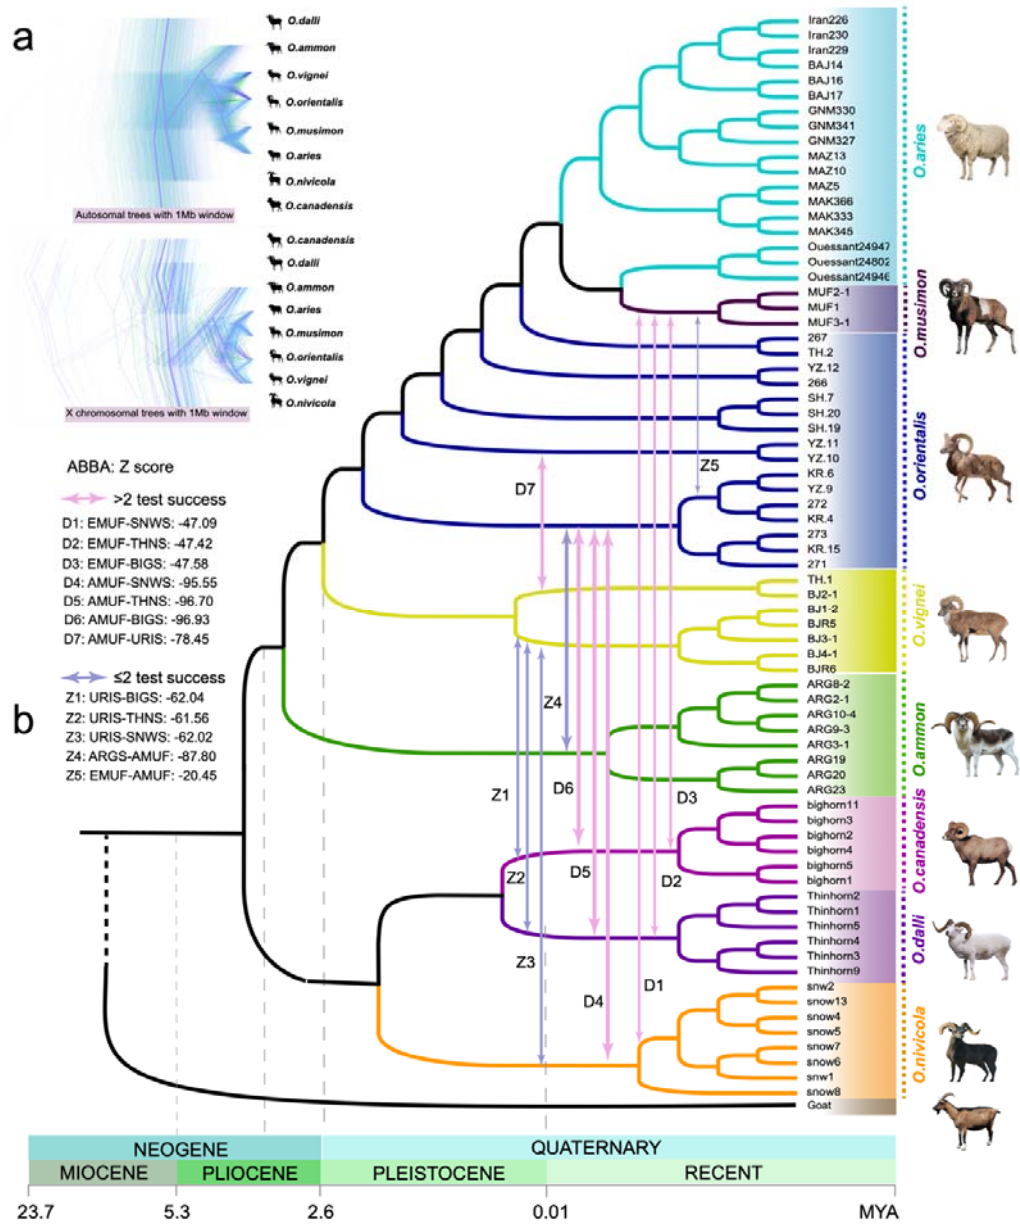

**Figure 3**

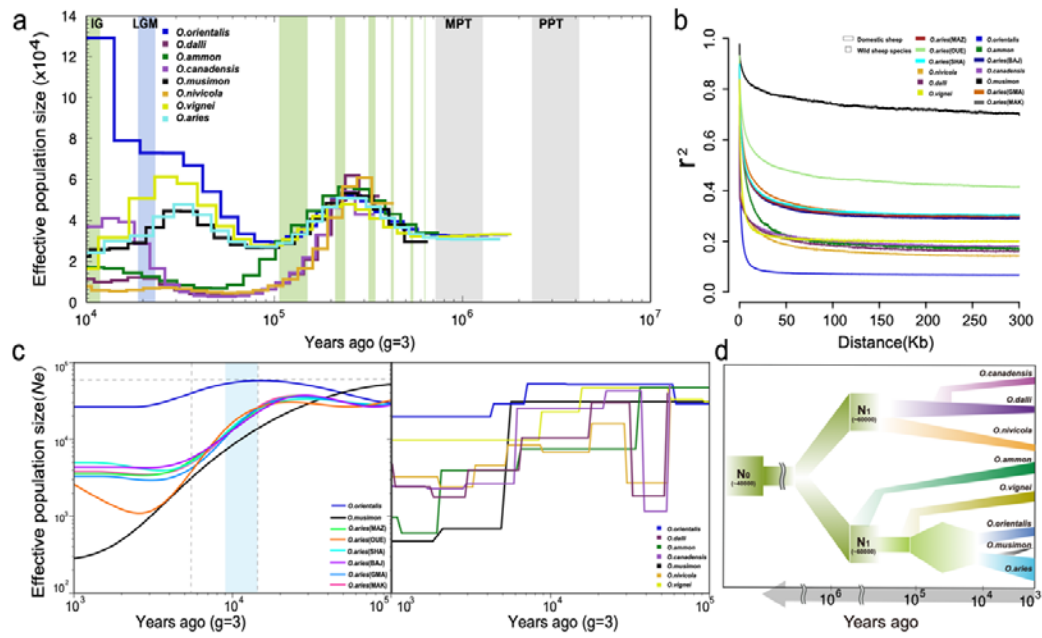



**Figure 4**

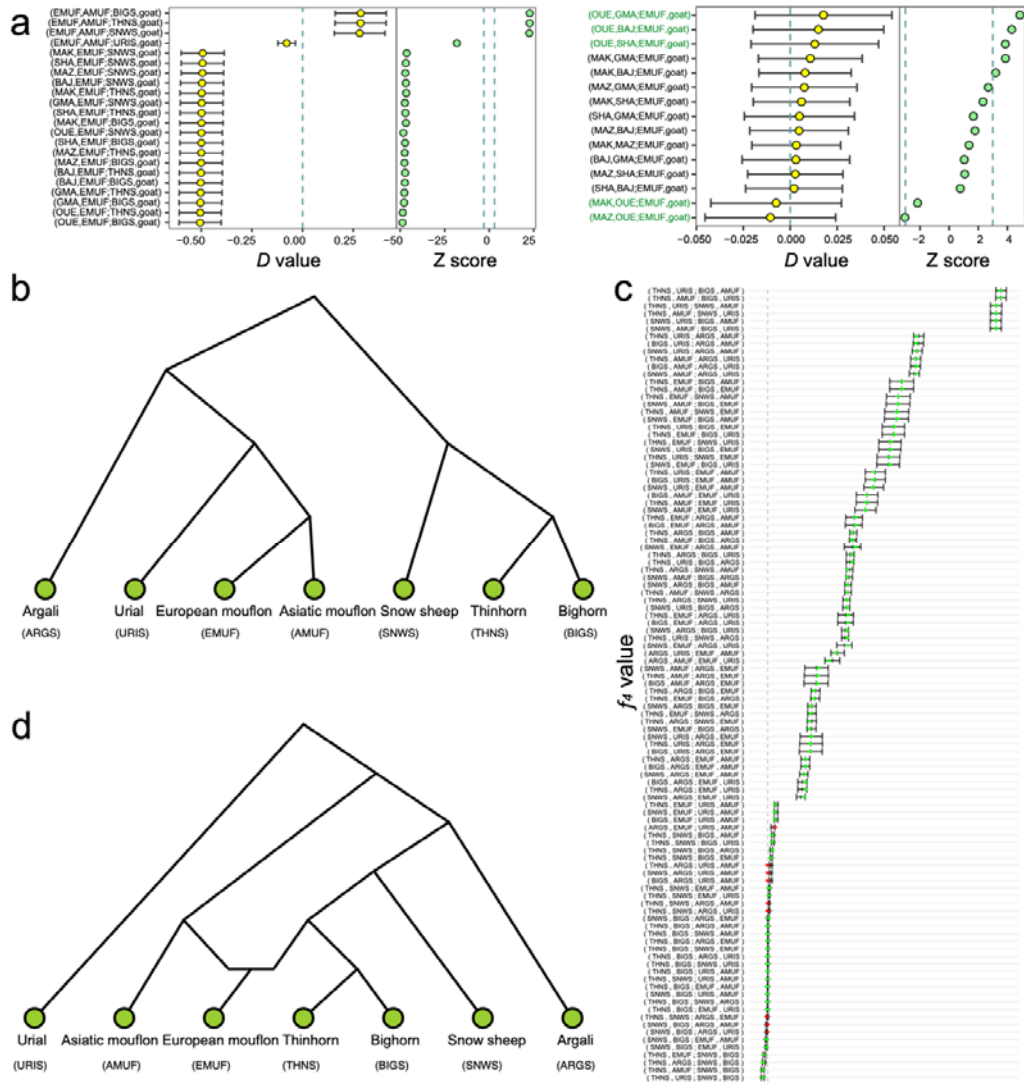

**Figure 5**

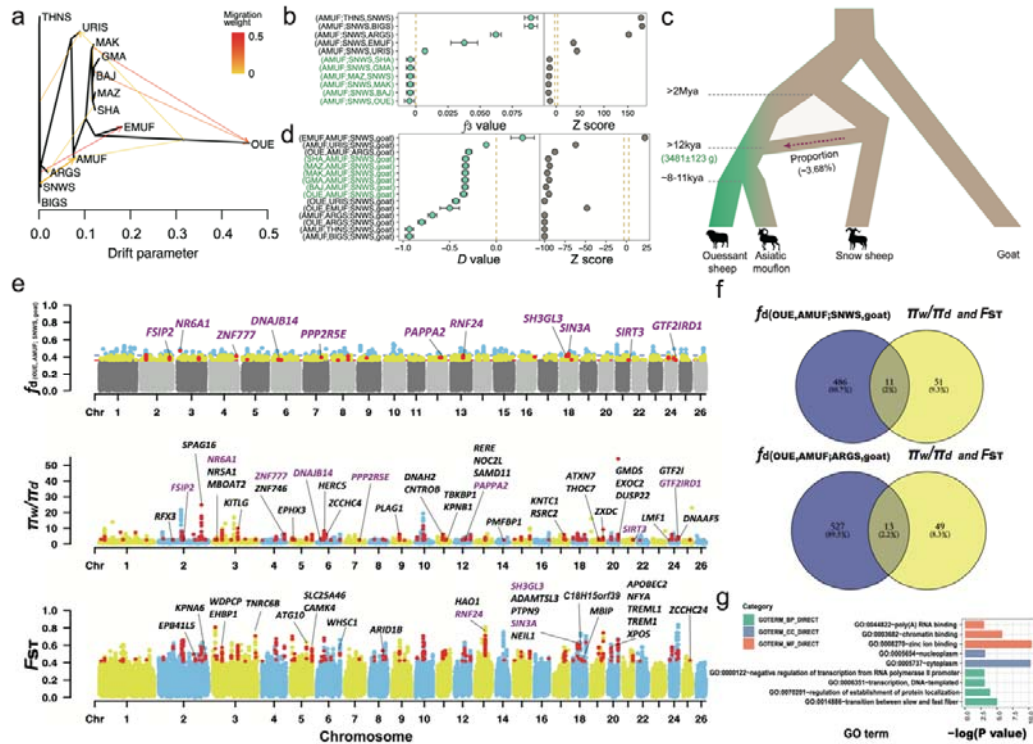

**Figure 6**

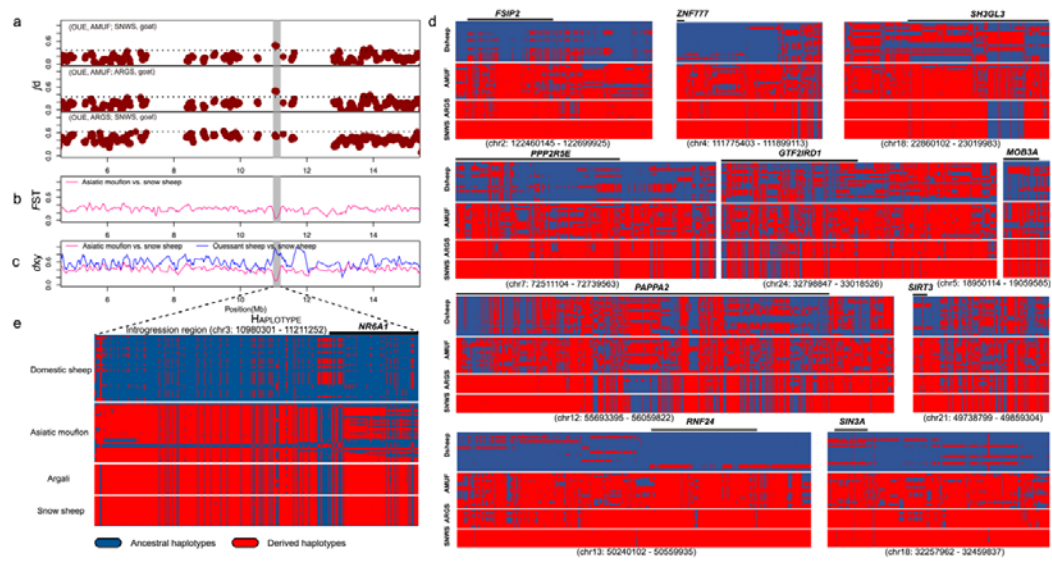

Source: https://www.biorxiv.org/content/10.1101/2021.09.07.458675v1.full.pdf
